# Supplementary material for: Solvent-induced structural and optical transformations in a hybrid copper phosphate framework
Source: Royal Society of Chemistry journal article supplement (doi:10.1039/d6ce00295a), 2026-05-25
Supplement: d6ce00295a1.pdf [file d6ce00295a1.pdf]

# Solvent-Induced Structural and Optical Transformations in a Hybrid Copper Phosphate Framework

Isis P. Carmona-Sepúlveda, Adelaide R. Kerenick, and Julie L. Fenton\*

*Department of Chemistry, The Pennsylvania State University,  
University Park, PA 16802, United States*

## Supplementary Information

| Correspondence Address                                                                                                                            |
|---------------------------------------------------------------------------------------------------------------------------------------------------|
| Professor Julie L. Fenton<br>Department of Chemistry<br>Pennsylvania State University<br>University Park, PA 16802 (USA)<br>Email: fenton@psu.edu |

## Table of Contents

|                                                   |      |
|---------------------------------------------------|------|
| <b>A.</b> Materials and instrumentation           | S-2  |
| <b>B.</b> Synthesis details                       | S-5  |
| <b>C.</b> Additional characterization data        | S-6  |
| <b>D.</b> Additional crystallographic information | S-17 |
| <b>E.</b> References                              | S-31 |

## A. Materials and Instrumentation.

### Materials

All reagents and solvents were commercially sourced as used without any further purification.  $\text{Cu}(\text{NO}_3)_2 \cdot 3\text{H}_2\text{O}$  (99+%), 4,4'-dipyridyl (98%), and o-phosphoric acid (85% w/w) were purchased from Sigma-Aldrich. *N,N*-dimethylformamide (DMF) (99+%) was purchased from Fisher Scientific. Solvents, including ethanol (EtOH) were of analytical grade. Dry MeOH was prepared by stirring over activated 3 Å molecular sieves under a continuous  $\text{N}_2$  purge for 2 hours and stored under a  $\text{N}_2$  atmosphere prior to use.

### Instrumentation

**Powder X-ray Diffraction.** Powder X-ray diffraction (pXRD) patterns were obtained at room temperature on a Bruker D2 Phaser diffractometer using  $\text{Cu K}\alpha$  radiation ( $\lambda = 1.54056 \text{ \AA}$ ). Scan rates were 0.25 s/step with a step size of  $0.02^\circ$  within a  $5\text{-}60^\circ$  range. PXRD scans were collected after single crystals were finely ground in a powder stored in vials at room temperature under normal atmosphere and loaded onto a zero-background silicon plate.

**Single Crystal X-ray Diffraction.** Single crystal X-ray diffraction (scXRD) data collections were performed using the Rigaku Oxford Diffraction (ROD) Synergy Custom diffractometer comprising of Rigaku MicroMax 007 rotating anode  $\text{Cu K}\alpha$  radiation X-ray generator ( $\lambda = 1.5418 \text{ \AA}$ ) operating at 40 kV 30 mA and HyPix-Arc 150 photon counting detector. A suitable single crystal was selected and mounted on a quartz fiber with cyanoacrylate glue. Data collection was performed at 173-400 K temperature ranges using the Cobra Oxford Cryosystem. Data reduction was performed with the CrysAlisPro software using both numerical absorption and Gaussian correction methods. Using OLEX2, the structure was solved with the SHELXT structure solution program using intrinsic phasing and refined with the SHELXL refinement package using least-squares minimization methods. Restraints on anisotropic displacement parameters were applied to ensure physically reasonable thermal ellipsoids for disordered atoms. Hydrogen atoms were expressed on organic species in the most probable geometric positions once the relevant carbon and nitrogen atoms were assigned and refined. The three-dimensional crystal structure was modeled using the Visualization for Electronic and Structural Analysis (VESTA) software.

**Variable Temperature Diffuse Reflectance UV-Vis Spectroscopy.** Data was collected using a PerkinElmer Lambda 950 equipped with the 150 nm integrating sphere detector. The sample compartment was equipped with the Praying Mantis (Harrick) diffuse reflection accessory and the sample was introduced in the temperature chamber mounted with  $\text{CaF}_2$  windows. The sample was diluted with  $\text{BaSO}_4$  and finely grinded into a powder using a mortar and pestle prior to loading it inside the cell. The temperature was controlled using the automatic temperature controller (ATC, Harrick) autotuned at 200 °C. Pure  $\text{BaSO}_4$  was used for the baseline. Data collection was performed under a flow of dry synthetic air (25 mL/min) between 30 °C and 210 °C with a heating rate of 5 °C/min,

collecting a spectrum every 10 °C steps with 5-min hold at the desired temperature before data acquisition. Data was collected between 200-1000 nm with 2 nm intervals, and 0.32 s integration with a 4 nm slit. The lamp changeover was set at 319.2 nm, while monochromator and detector changes was set at 860.8 nm. Data was converted from diffuse reflectance to pseudo-absorption data using the Kubelka-Munk function.

**Variable Temperature Powder X-ray Diffraction.** Powder X-ray diffraction patterns were collected at 45 kV and 40 mA on a 240mm radius Panalytical Empyrean® theta-theta X-ray diffractometer equipped with an Anton Parr HTK1200 non-ambient chamber and a copper (Cu) line source [ $K\alpha_{1-2} = 1.540598/1.544426 \text{ \AA}$ ] X-ray tube. Data was collected with a step size of  $0.0167^\circ$  from  $5-60^\circ$  2-theta. The sample was finely ground into a powder and mounted using a top-load method into an alumina crucible (16 mm diameter and 0.8 mm deep). The incident optics consisted of a Bragg-Brentano HD® Cu optic fitted with 0.04 rad. Soller slits, a 4 mm beam mask,  $1/8^\circ$  and  $1/2^\circ$  divergence, and anti-scatter slit respectively. The diffracted optics included a X'Celerator® detector with a  $2.1223^\circ$  active length in scanning line mode with a  $1/2^\circ$  programmable anti-scatter slit and 0.04 rad Soller slits. Experimental data was collected as the sample was heated from room temperature to 135 °C, with 60 °C/min temperature increments, and ten-minute hold times before each scan collection.

**Scanning Electron Microscopy and Energy Dispersive X-ray Spectroscopy.** Crystal morphology and elemental mapping were collected using a ThermoScientific Apreo S Scanning Electron Microscope with a tungsten filament and fitted with an Oxford instruments Ultim Max EDS detector. Crystals were selected and mounted on stainless steel studs with carbon tape. For the elemental analysis, at least three regions of at least three unique crystals were selected to confirm compositional homogeneity.

**Thermogravimetric Analysis.** Thermogravimetric analysis (TGA) was carried out on a TA Instruments Discovery TGA 550. Samples were loaded in platinum pans, approximately weighing 2 mg. Measurements were collected under a flow of nitrogen (90 mL/min) from 25-500 °C with a heating rate of 10 °C/min and 5 min isotherms.

**X-ray Photoelectron Spectroscopy.** XPS experiments were performed using a Physical Electronics VersaProbe III instrument equipped with a monochromatic Al  $K\alpha$  x-ray source ( $h\nu = 1486.6 \text{ eV}$ ) and a concentric hemispherical analyzer. Charge neutralization was performed using both low energy electrons ( $<5 \text{ eV}$ ) and argon ions. The binding energy axis was calibrated using sputter cleaned Cu (Cu  $2p_{3/2} = 932.62 \text{ eV}$ , Cu  $3p_{3/2} = 75.1 \text{ eV}$ ) and Au foils (Au  $4f_{7/2} = 83.96 \text{ eV}$ ). Peaks were charge referenced to  $CH_x$  band in the carbon 1s spectra at 284.8 eV. Measurements were made at a takeoff angle of  $45^\circ$  with respect to the sample surface plane. This resulted in a typical sampling depth of 3-6 nm (95% of the signal originated from this depth or shallower). Quantification was done using instrumental relative sensitivity factors (RSFs) that account for the X-ray cross section and inelastic mean free path of the electrons. On homogeneous samples major elements ( $>5 \text{ atom\%}$ ) tend to have standard deviations of  $<3\%$  while minor elements can be significantly higher. The analysis size was  $\sim 200\mu\text{m}$  in diameter.

**Optical Microscopy.** High-resolution images were obtained using a Nikon SMZ18 optical microscope.

**Surface area and pore size measurement.** Nitrogen physisorption experiments were performed using a Micromeritics 3Flex Surface Characterization Analyzer. The sample was weighed into a 12 mm flat-bottom sample tube, fitted with a check seal cap and hanging filler rod, then evacuated under dynamic vacuum using a Micromeritics VacPrep 061 unit. The degassing procedure for isotherm collection involved heating the sample to 120 °C at a ramp rate of 1.5 degrees/min, then holding at 120 °C for 48 hours under a pressure of 0.1 Torr. Prior to analysis, the sealed samples were reweighed and immediately transferred to the 3Flex sample ports. The nitrogen adsorption-desorption isotherm was measured at -196 °C (77 K) with the saturation pressure recorded at each data point. After the isotherm was completed, the analysis and ambient free space was measured with helium. For data analysis, Brunauer Emmett-Teller (BET) surface areas were calculated from the linear region of the isotherm at 77 K within the pressure range  $P/P_0$  of 0.05 – 0.1. Pore size measurements were calculated using the Horvath-Kawazoe method fitted for a slit pore geometry within the pressure range  $P/P_0$  of 0.003 – 0.1.

**Room Temperature Diffuse Reflectance UV-Vis Spectroscopy.** The absorption spectrum for the methanol-absorbed sample was collected as diffuse reflectance from 220-900 nm and converted to pseudo-absorption data using the Kubelka-Munk function in the native Shimadzu software. Data was collected on a Shimadzu UV-2600i UV-Vis spectrophotometer with an ISR-2600 Plus integrating sphere attachment.

## B. Synthesis Details

**Synthesis of  $\text{Cu}_4(4,4'\text{-bipy})_4(\text{H}_2\text{PO}_4)_4 \cdot 6\text{H}_2\text{O}$ .** In a 40 mL septa-capped vial,  $\text{Cu}(\text{NO}_3)_2 \cdot 3\text{H}_2\text{O}$  (0.5 mmol), and 4,4'-dipyridyl (0.25 mmol) were dissolved in a solvent mixture of DMF (4 mL) and distilled  $\text{H}_2\text{O}$  (12 mL). After this,  $\text{H}_3\text{PO}_4$  85% (1.6 mL) was slowly added into the solution and stirred for at least 5 minutes until a clear blue solution was obtained. The solution was heated to 140 °C for 24 h until yellow plate-like crystals were observed (yield ~90%). The vial was then removed from the heat to allow to cool under ambient conditions. These crystals were collected, washed with distilled water and ethanol to remove residual solvent, and air dried at room temperature. Samples were stored in vials for further characterization. Additional stoichiometric ratios and solvent mixtures were investigated (e.g. 1:2, 1:3, no DMF, no  $\text{H}_2\text{O}$ ), but no crystallization was observed under these conditions.

**Post-synthetic solvent absorption.** Approximately 15 mg of the as-synthesized crystals were loaded into a round-bottom flask and desolvated under dynamic vacuum at 80 °C for 15 minutes, until a color change was observed from yellow to red. The flask was then removed from heat and allowed to cool to room temperature under  $\text{N}_2$ . Dry MeOH was subsequently injected into the flask, and the crystals were allowed to soak for 10 minutes, during which a complete color change to yellow was observed. The resulting material was transferred to a vial and stored under ambient conditions.

### C. Additional structural characterization

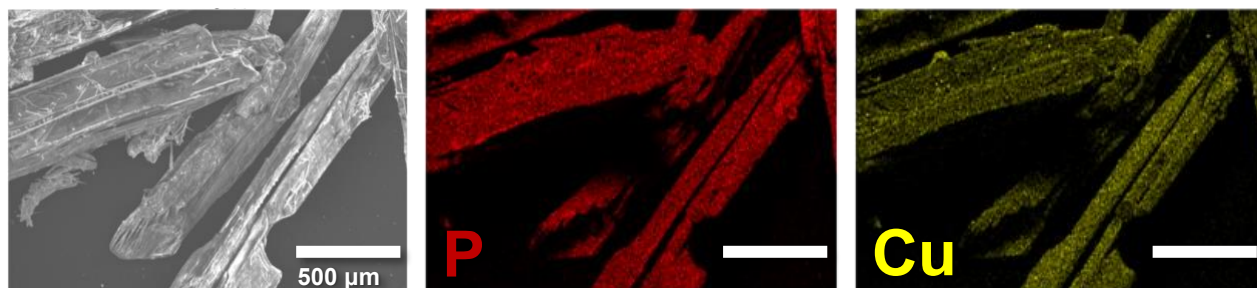

**Figure S1.** Scanning electron micrographs and elemental maps analyzing the composition of the as-synthesized  $\text{Cu}_4(4,4'\text{-bipy})_4(\text{H}_2\text{PO}_4)_4 \cdot 6\text{H}_2\text{O}$ .

**Table S1.** Crystallographic details at different temperatures (hydrated and dehydrated).

| Temperature                    | -100 °C (173 K)                                                                                                                                                                     | 125 °C (400 K)                                                                                                                                                     |
|--------------------------------|-------------------------------------------------------------------------------------------------------------------------------------------------------------------------------------|--------------------------------------------------------------------------------------------------------------------------------------------------------------------|
| Empirical formula              | $\text{C}_{40}\text{H}_{37}\text{Cu}_4\text{N}_8\text{O}_{16}\text{P}_4$                                                                                                            | $\text{C}_{10}\text{H}_{10}\text{CuN}_2\text{O}_4\text{P}$                                                                                                         |
| Wavelength                     | Cu $K\alpha$ ( $\lambda = 1.54184 \text{ \AA}$ )                                                                                                                                    |                                                                                                                                                                    |
| Crystal system                 | Triclinic                                                                                                                                                                           | Monoclinic                                                                                                                                                         |
| Space group                    | $P\bar{1}$                                                                                                                                                                          | $P2/c$                                                                                                                                                             |
| Unit cell dimensions           | a = 8.87240(10) $\text{\AA}$<br>b = 16.9583(3) $\text{\AA}$<br>c = 17.6998(4) $\text{\AA}$<br>$\alpha = 76.181(2)^\circ$<br>$\beta = 89.867(2)^\circ$<br>$\gamma = 89.996(2)^\circ$ | a = 8.5755(3) $\text{\AA}$<br>b = 8.7283(2) $\text{\AA}$<br>c = 8.5690(3) $\text{\AA}$<br>$\alpha = 90^\circ$<br>$\beta = 105.924(4)^\circ$<br>$\gamma = 90^\circ$ |
| Volume                         | 2586.04(8) $\text{\AA}^3$                                                                                                                                                           | 616.77(4) $\text{\AA}^3$                                                                                                                                           |
| Z                              | 2                                                                                                                                                                                   | 2                                                                                                                                                                  |
| Density (calc.)                | 1.624 $\text{g/cm}^3$                                                                                                                                                               | 1.705 $\text{g/cm}^3$                                                                                                                                              |
| Absorption coefficient         | 3.656 $\text{mm}^{-1}$                                                                                                                                                              | 3.832 $\text{mm}^{-1}$                                                                                                                                             |
| F(000)                         | 1276.0                                                                                                                                                                              | 320.0                                                                                                                                                              |
| $\theta$ for data collection   | 5.142° to 152.424°                                                                                                                                                                  | 10.134° to 151.916°                                                                                                                                                |
| Index ranges                   | -10 $\leq h \leq$ 11<br>-18 $\leq k \leq$ 21<br>-21 $\leq l \leq$ 21                                                                                                                | -9 $\leq h \leq$ 10<br>-10 $\leq k \leq$ 10<br>-10 $\leq l \leq$ 8                                                                                                 |
| Reflections collected          | 34946                                                                                                                                                                               | 6161                                                                                                                                                               |
| Independent reflections        | 10260                                                                                                                                                                               | 1257                                                                                                                                                               |
| Completeness                   | 99.9%                                                                                                                                                                               | 100%                                                                                                                                                               |
| Data/restraints/parameters     | 10260/18/655                                                                                                                                                                        | 1257/0/97                                                                                                                                                          |
| GOOF                           | 1.068                                                                                                                                                                               | 0.999                                                                                                                                                              |
| $R_{\text{int}}$               | 0.0566                                                                                                                                                                              | 0.0342                                                                                                                                                             |
| R indices [ $I > 2\sigma(I)$ ] | 0.1294                                                                                                                                                                              | 0.1053                                                                                                                                                             |
| R indices (all data)           | 0.1360                                                                                                                                                                              | 0.1088                                                                                                                                                             |

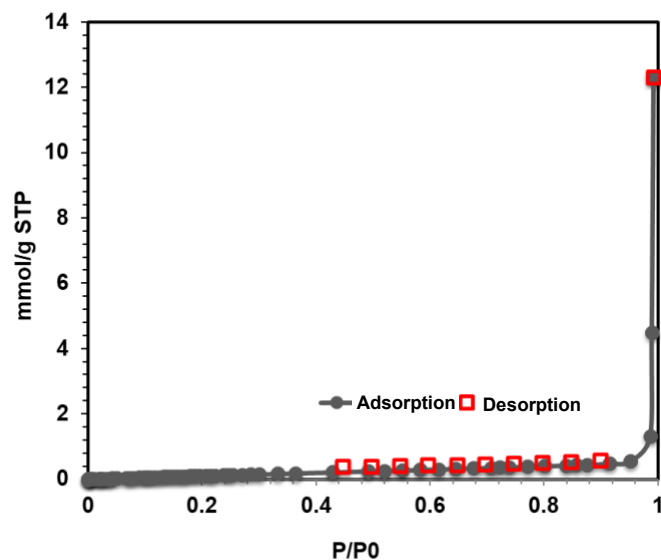

| BET Report        |                              | Horvath-Kawazoe Report  |                             |
|-------------------|------------------------------|-------------------------|-----------------------------|
| BET surface area: | 16.5 ± 0.1 m <sup>2</sup> /g | Median pore width       | 12.291 Å                    |
| Slope:            | 4.44 ± 0.04 g/mmol           | Maximum pore volume     | 0.003342 cm <sup>3</sup> /g |
| Y-intercept:      | 1.481 ± 0.007 g/mmol         | at Relative Pressure    | 0.179186713                 |
| C:                | 3.996                        | Relative pressure range | 1e-09 to 0.18               |
| Qm:               | 0.16902 mmol/g               |                         |                             |

**Figure S2.** Nitrogen absorption isotherm for dried sample of  $\text{Cu}_4(4,4'\text{-bipy})_4(\text{H}_2\text{PO}_4)_4 \cdot 6\text{H}_2\text{O}$ . Gray trace is adsorption; open red squares are desorption. The summary data computed from this isotherm, including BET surface area and median pore size, are given in the accompanying table.

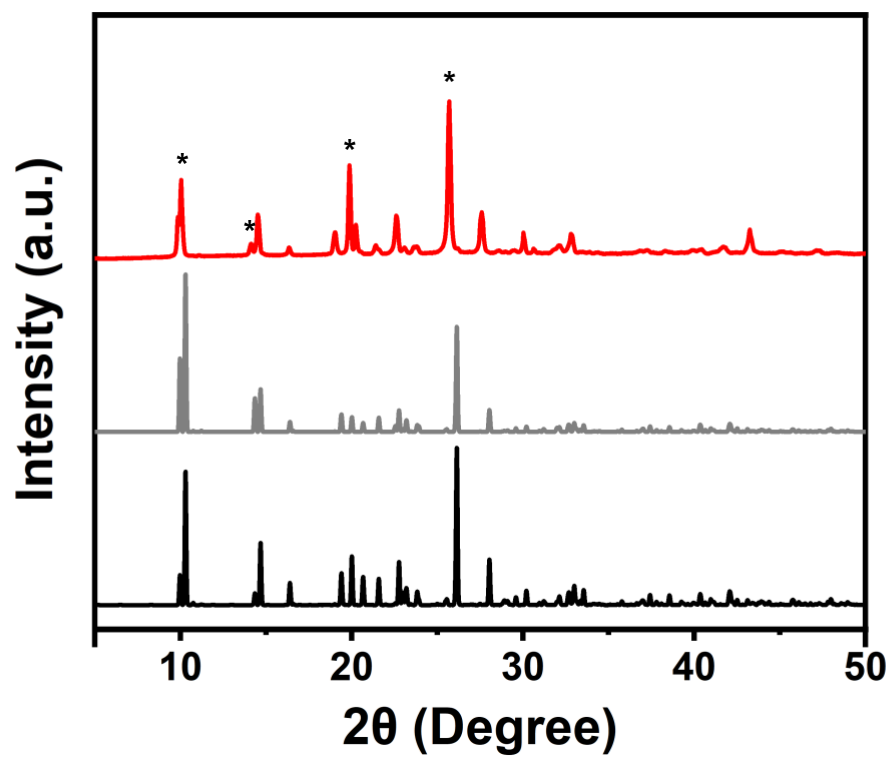

**Figure S3.** Powder X-ray diffractograms of simulated pattern without (black) and with (gray) solvent mask compared to the experimental pattern.

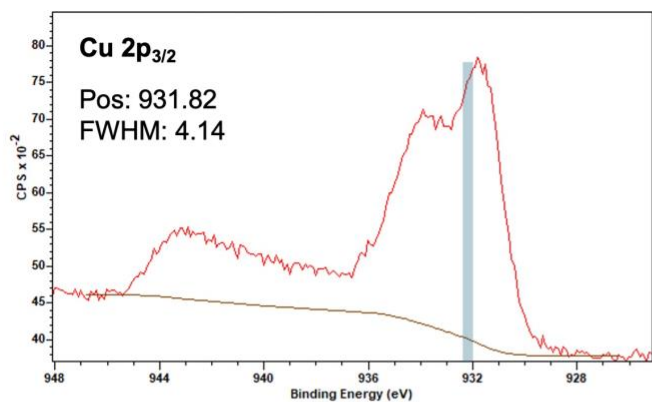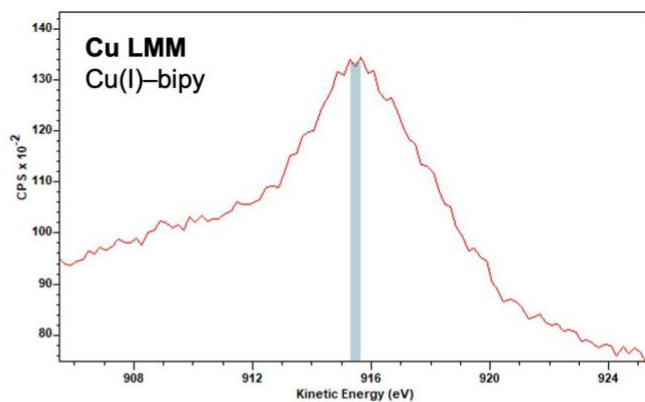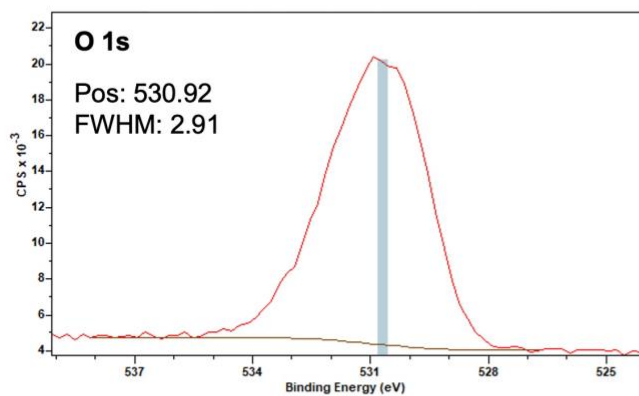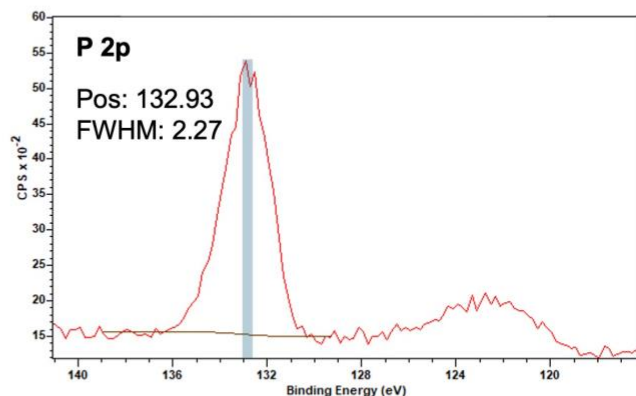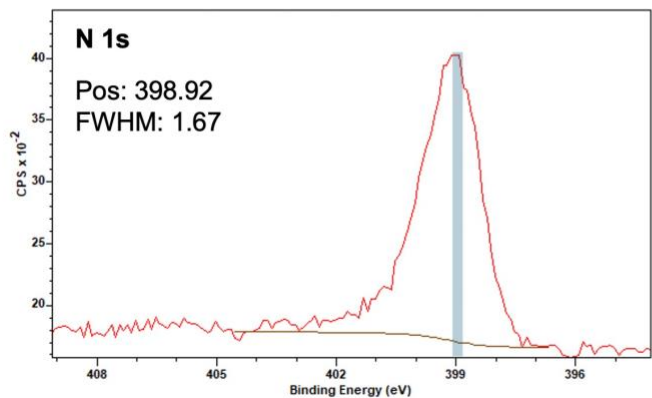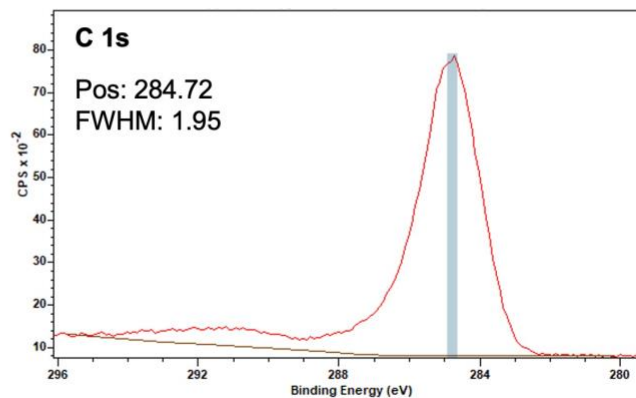

**Figure S4.** XPS binding energy spectra for  $\text{Cu}_4(4,4'\text{-bipy})_4(\text{H}_2\text{PO}_4)_4 \cdot 6\text{H}_2\text{O}$  with the characteristic signals for Cu, P, O, N, and C.

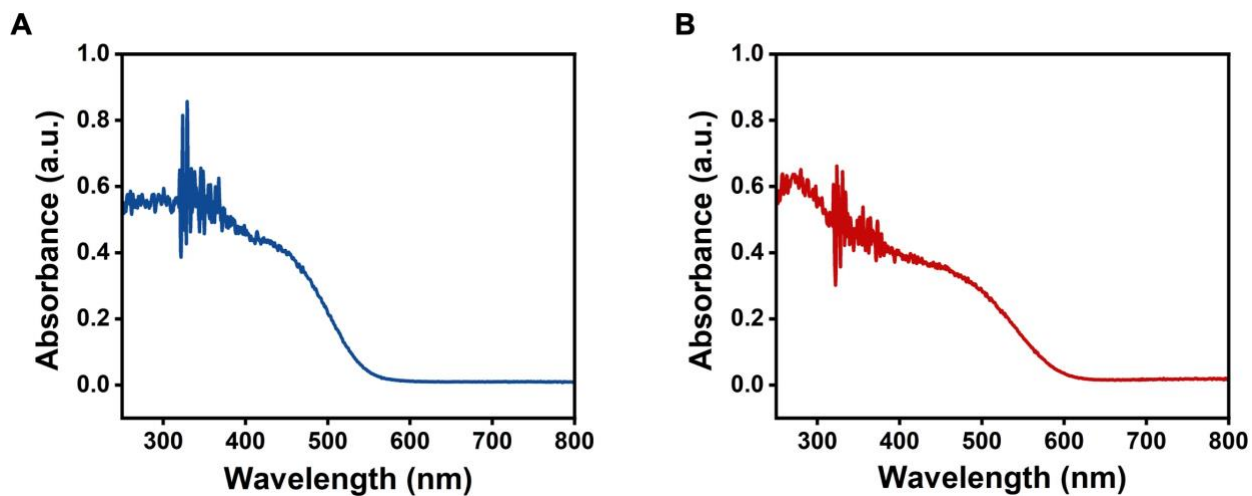

**Figure S5.** Absorption spectras of  $\text{Cu}_4(4,4'\text{-bipy})_4(\text{H}_2\text{PO}_4)_4 \cdot 6\text{H}_2\text{O}$  at A) room temperature and B) 170 °C.

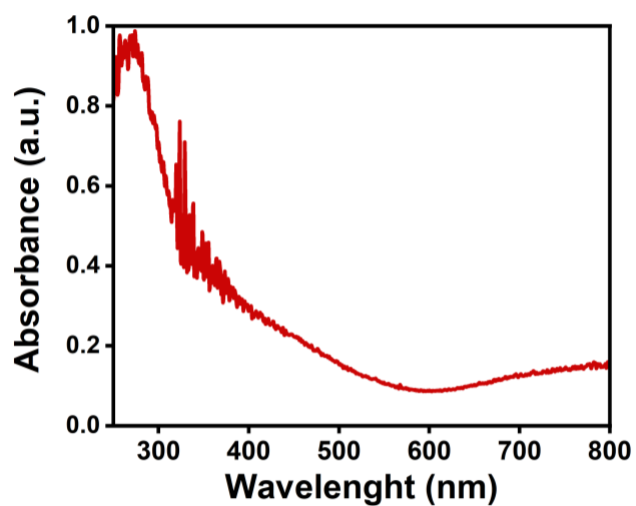

**Figure S6.** Absorption spectra of  $\text{Cu}_4(4,4'\text{-bipy})_4(\text{H}_2\text{PO}_4)_4 \cdot 6\text{H}_2\text{O}$  at 250 °C.

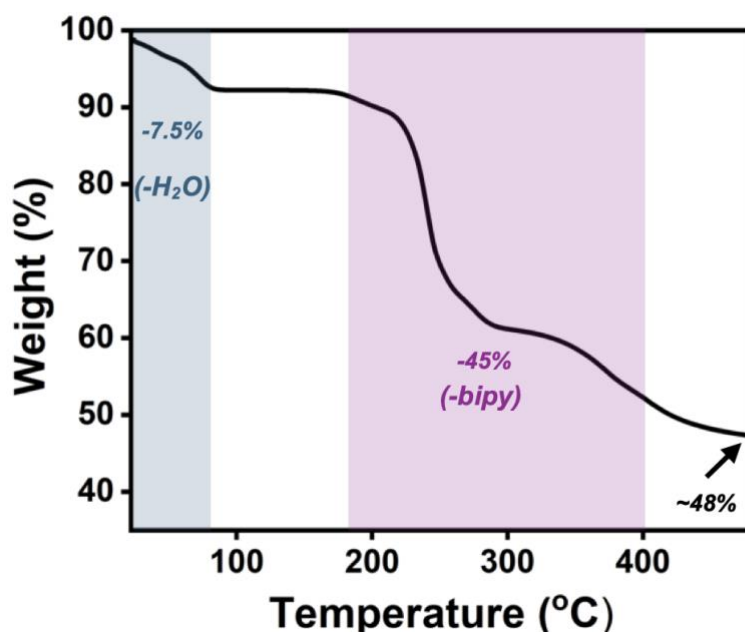

**Figure S7.** Thermogravimetric analysis (TGA) plot of as-synthesized single crystals. Regions corresponding to the loss of structural water and 4,4'-bipyridine ligands are highlighted in blue and purple, respectively. The final residual mass (approx. 48%) corresponds to residual oxidized copper(II) phosphate species as the final decomposition product. Experiment was performed under nitrogen.

**Table S2.** Theoretical and actual weight loss percentages with TGA for the as-synthesized single crystals of  $\text{Cu}_4(4,4'\text{-bipy})_4(\text{H}_2\text{PO}_4)_4 \cdot 6\text{H}_2\text{O}$  (MW = 1,374.68 g/mol).

|                                | Molecular weight (g/mol) | Total in compound | % of compound mass |
|--------------------------------|--------------------------|-------------------|--------------------|
| 4,4'-bipyridine                | 158.18 (4 mol)           | 624.72            | 45.4               |
| H <sub>2</sub> O               | 18.02 (6 mol)            | 108.12            | 7.9                |
| Cu                             | 63.55 (4 mol)            | 254.20            | 18.5               |
| H <sub>2</sub> PO <sub>4</sub> | 96.91 (4 mol)            | 387.64            | 28.2               |

| Temperature (°C) | Experimental mass loss (TGA, %) | Hypothesized process                                             |
|------------------|---------------------------------|------------------------------------------------------------------|
| 0-100            | 7.5                             | Loss of water from structural pores (theoretical: 7.9% of mass)  |
| 170-400          | 45                              | Volatilization of 4,4'-bipy ligands (theoretical: 45.4% of mass) |
| >400             | minimal                         | remnant Cu(II) phosphate species (theoretical: 47.5% of mass)    |

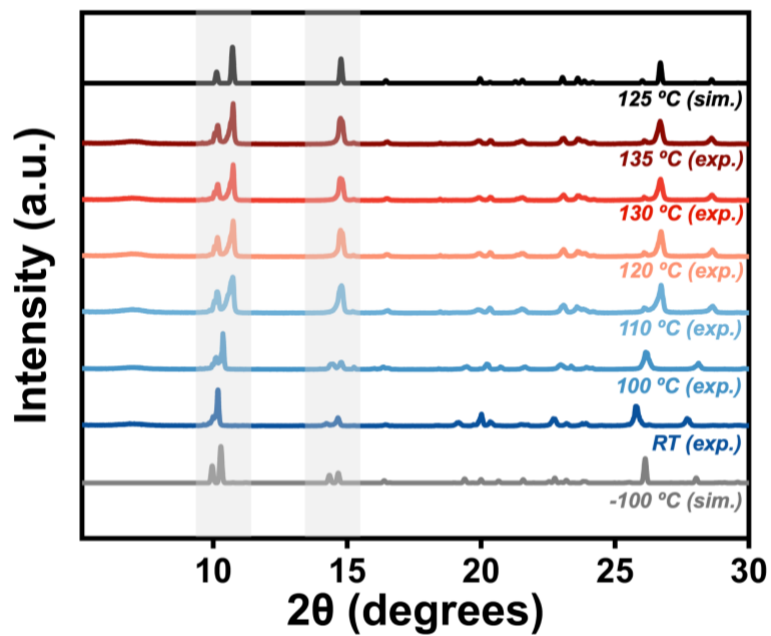

**Figure S8.** Experimental variable-temperature powder X-ray diffractograms, and simulated patterns at low and high temperatures. The highlighted peaks illustrate temperature-dependent structural transformations and symmetry changes.

**Table S3.** Crystallographic data of MeOH-absorbed single crystals as-intercalated and stored in ambient conditions for two months.

|                                                   | <i>Freshly intercalated</i>                                                                                        | <i>Stored for two months</i>                                                                                        |
|---------------------------------------------------|--------------------------------------------------------------------------------------------------------------------|---------------------------------------------------------------------------------------------------------------------|
| <b>Temperature</b>                                | -100 °C (173 K)                                                                                                    |                                                                                                                     |
| <b>Empirical formula</b>                          | C <sub>11</sub> H <sub>14</sub> CuN <sub>2</sub> O <sub>5</sub> P                                                  |                                                                                                                     |
| <b>Wavelength</b>                                 | Cu K $\alpha$ ( $\lambda$ = 1.54184 Å)                                                                             |                                                                                                                     |
| <b>Crystal system</b>                             | Monoclinic                                                                                                         |                                                                                                                     |
| <b>Space group</b>                                | <i>Pc</i>                                                                                                          |                                                                                                                     |
| <b>Unit cell dimensions</b>                       | a = 8.9384(6) Å<br>b = 8.8927(5) Å<br>c = 8.4655(5) Å<br>$\alpha$ = 90°<br>$\beta$ = 103.346(7)°<br>$\gamma$ = 90° | a = 8.9149(9) Å<br>b = 8.8954(8) Å<br>c = 8.4547(8) Å<br>$\alpha$ = 90°<br>$\beta$ = 103.373(10)°<br>$\gamma$ = 90° |
| <b>Volume</b>                                     | 654.72(7) Å <sup>3</sup>                                                                                           | 652.29(11) Å <sup>3</sup>                                                                                           |
| <b>Z</b>                                          | 2                                                                                                                  | 2                                                                                                                   |
| <b>Density (calc.)</b>                            | 1.769 g/cm <sup>3</sup>                                                                                            | 1.776 g/cm <sup>3</sup>                                                                                             |
| <b>Absorption coefficient</b>                     | 3.731 mm <sup>-1</sup>                                                                                             | 3.745 mm <sup>-1</sup>                                                                                              |
| <b>F(000)</b>                                     | 356.0                                                                                                              |                                                                                                                     |
| <b><math>\theta</math> for data collection</b>    | 9.946° to 149.784°                                                                                                 | 9.944° to 152.314°                                                                                                  |
| <b>Index ranges</b>                               | -11 $\leq h \leq$ 10<br>-11 $\leq k \leq$ 10<br>-6 $\leq l \leq$ 10                                                | -9 $\leq h \leq$ 11<br>-10 $\leq k \leq$ 10<br>-10 $\leq l \leq$ 7                                                  |
| <b>Reflections collected</b>                      | 3318                                                                                                               | 6130                                                                                                                |
| <b>Independent reflections</b>                    | 1746                                                                                                               | 2066                                                                                                                |
| <b>Completeness</b>                               | 100%                                                                                                               |                                                                                                                     |
| <b>Data/restraints/parameters</b>                 | 1746/14/186                                                                                                        | 2066/6/209                                                                                                          |
| <b>GOOF</b>                                       | 1.098                                                                                                              | 1.078                                                                                                               |
| <b>R<sub>int</sub></b>                            | 0.0415                                                                                                             | 0.0483                                                                                                              |
| <b>R indices [<math>I &gt; 2\sigma(I)</math>]</b> | 0.0510                                                                                                             | 0.0418                                                                                                              |
| <b>R indices (all data)</b>                       | 0.0556                                                                                                             | 0.0802                                                                                                              |
| <b>Flack parameter</b>                            | 0.32(8)                                                                                                            | 0.34(11)                                                                                                            |

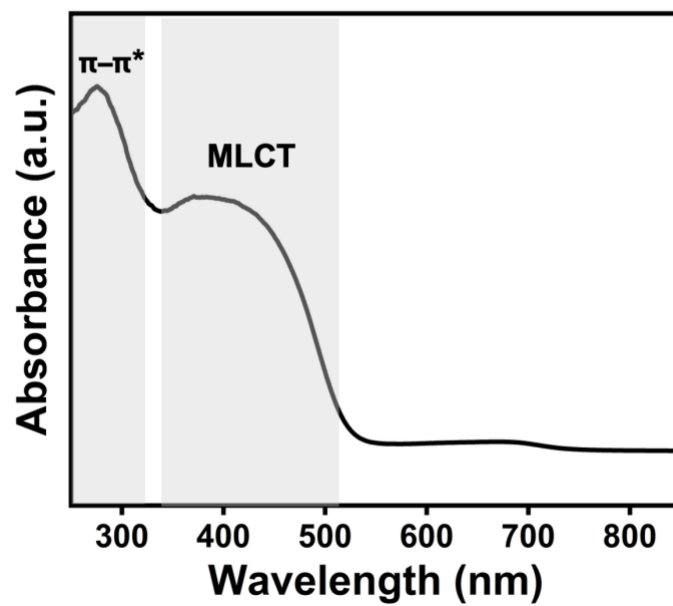

**Figure S9.** Absorption spectra of methanol-absorbed crystals at room temperature.

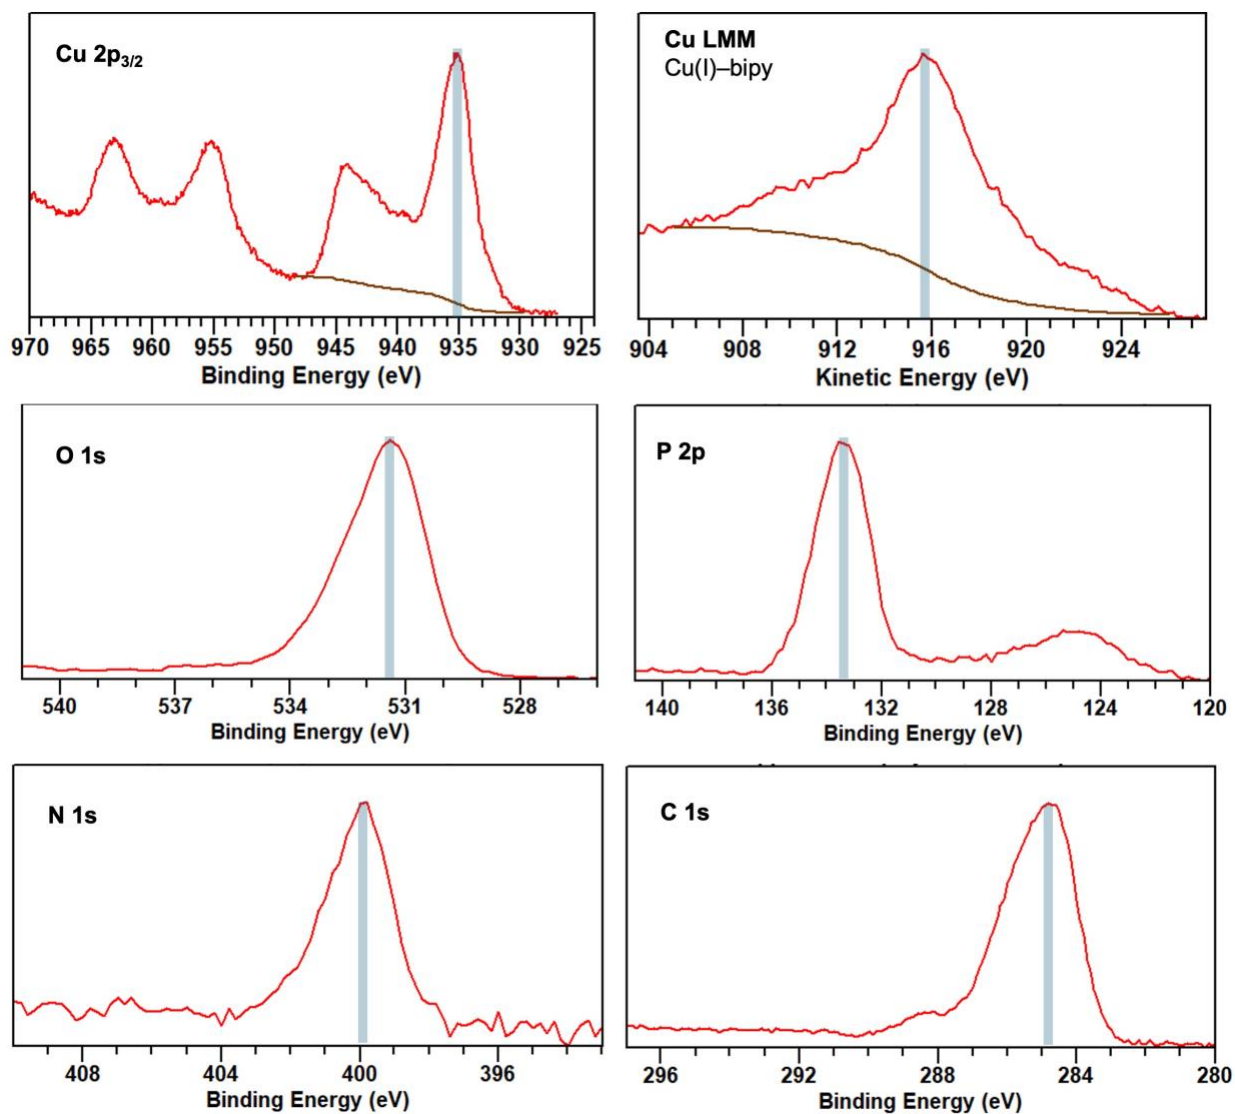

**Figure S10.** XPS binding energy spectra for the MeOH-absorbed crystals with the characteristic signals for Cu, P, O, N, and C after two months of storage. The Cu signal indicates the presence of both Cu(I) and Cu(II), suggesting partial surface oxidation after storage in ambient environments.

**Table S4.** Summary of crystallographic parameters, Cu coordination geometry, and optical absorption maxima in all three structural states.

| Structural state          | Hydrated                                                                                                                                           | Dehydrated                                                                                                                        | MeOH-absorbed                                                                                                                     |
|---------------------------|----------------------------------------------------------------------------------------------------------------------------------------------------|-----------------------------------------------------------------------------------------------------------------------------------|-----------------------------------------------------------------------------------------------------------------------------------|
| Unit cell dimensions      | a = 8.87240(10) Å<br>b = 16.9583(3) Å<br>c = 17.6998(4) Å<br>$\alpha = 76.181(2)^\circ$<br>$\beta = 89.867(2)^\circ$<br>$\gamma = 89.996(2)^\circ$ | a = 8.5755(3) Å<br>b = 8.7283(2) Å<br>c = 8.5690(3) Å<br>$\alpha = 90^\circ$<br>$\beta = 105.924(4)^\circ$<br>$\gamma = 90^\circ$ | a = 8.9384(6) Å<br>b = 8.8927(5) Å<br>c = 8.4655(5) Å<br>$\alpha = 90^\circ$<br>$\beta = 103.346(7)^\circ$<br>$\gamma = 90^\circ$ |
| Crystal system            | Triclinic                                                                                                                                          | Monoclinic                                                                                                                        | Monoclinic                                                                                                                        |
| Space group               | $P\bar{1}$                                                                                                                                         | $P2/c$                                                                                                                            | $Pc$                                                                                                                              |
| Cell volume               | 2586.04(8) Å <sup>3</sup>                                                                                                                          | 616.77(4) Å <sup>3</sup>                                                                                                          | 654.72(7) Å <sup>3</sup>                                                                                                          |
| Cu coordination geometry  | Trigonal planar                                                                                                                                    | Distorted tetrahedral                                                                                                             |                                                                                                                                   |
| Optical absorption maxima | 330 nm                                                                                                                                             | 250 nm                                                                                                                            | 260 nm                                                                                                                            |

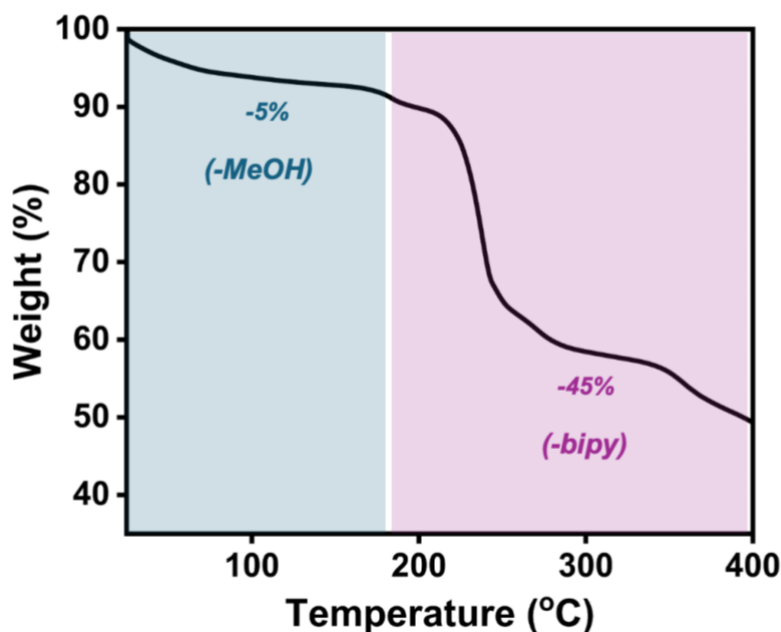

**Figure S11.** TGA plot of methanol-absorbed single crystals. Regions corresponding to the loss of structural methanol and 4,4'-bipyridine ligands are highlighted in blue and purple, respectively.

**Table S5.** Actual weight loss percentages of the methanol-absorbed crystals: Cu(4,4'-bipy)(H<sub>2</sub>PO<sub>4</sub>)(MeOH). (MW= 348.75 g/mol)

| Temperature (°C) | Experimental mass loss (TGA, %) | Hypothesized process                                                |
|------------------|---------------------------------|---------------------------------------------------------------------|
| 0-170            | 9.8                             | Loss of methanol from structural pores (theoretical: 9.18% of mass) |
| 170-400          | 44.8                            | Volatilization of 4,4'-bipy ligands (theoretical: 45.4% of mass)    |

## D. Additional crystallographic information

### a. Hydrated and dehydrated crystals

**Table S4.** Selected bond lengths at different temperatures.

| Atom                    | Atom            | Length (Å) |
|-------------------------|-----------------|------------|
| <b>Low temperature</b>  |                 |            |
| Cu1                     | O8              | 2.241(6)   |
| Cu1                     | N1              | 1.924(8)   |
| Cu1                     | N4 <sup>1</sup> | 1.921(7)   |
| Cu2                     | O13             | 2.356(8)   |
| Cu2                     | N3              | 1.919(7)   |
| Cu2                     | N2              | 1.896(7)   |
| Cu3                     | O1 <sup>2</sup> | 2.309(9)   |
| Cu3                     | N7              | 1.911(8)   |
| Cu3                     | N6              | 1.897(8)   |
| Cu4                     | N5              | 1.911(8)   |
| Cu4                     | N8 <sup>1</sup> | 1.898(8)   |
| <b>High temperature</b> |                 |            |
| Cu1                     | O2              | 2.460(3)   |
| Cu1                     | O2 <sup>2</sup> | 2.460(3)   |
| Cu1                     | N1 <sup>2</sup> | 1.9299(18) |
| Cu1                     | N1              | 1.9299(18) |

<sup>1</sup>+X,1+Y,-1+Z, <sup>2</sup>1-X,+Y,3/2-Z

**Table S5.** Bond angles at different temperatures.

| Atom                   | Atom | Atom | Angle (°) | Atom | Atom | Atom             | Angle (°) |
|------------------------|------|------|-----------|------|------|------------------|-----------|
| <b>Low temperature</b> |      |      |           |      |      |                  |           |
| N1                     | Cu1  | O8   | 106.0(3)  | C14  | C15  | C16              | 121.4(8)  |
| N41                    | Cu1  | O8   | 98.7(3)   | C14  | C15  | C12              | 116.6(8)  |
| N41                    | Cu1  | N1   | 155.2(3)  | N1   | C10  | C9               | 123.6(8)  |
| N3                     | Cu2  | O13  | 101.7(3)  | C20  | C19  | C16              | 120.7(9)  |
| N2                     | Cu2  | O13  | 101.2(3)  | C9   | C6   | C5               | 119.7(8)  |
| N2                     | Cu2  | N3   | 156.8(3)  | C7   | C6   | C5               | 123.7(8)  |
| N7                     | Cu3  | O12  | 99.2(3)   | C7   | C6   | C9               | 116.5(8)  |
| N6                     | Cu3  | O12  | 103.1(3)  | N3   | C11  | C12              | 121.5(9)  |
| N6                     | Cu3  | N7   | 157.1(4)  | C40  | N8   | Cu4 <sup>2</sup> | 124.5(8)  |
| N8 <sup>1</sup>        | Cu4  | N5   | 157.3(5)  | C38  | N8   | Cu4 <sup>2</sup> | 119.6(8)  |
| O8                     | P2   | O7   | 107.5(4)  | C38  | N8   | C40              | 115.8(9)  |
| O8                     | P2   | O5   | 109.8(4)  | C2   | C5   | C6               | 118.2(7)  |
| O6                     | P2   | O8   | 114.2(4)  | C4   | C5   | C6               | 125.4(8)  |
| O6                     | P2   | O7   | 109.6(4)  | C4   | C5   | C2               | 116.3(8)  |
| O6                     | P2   | O5   | 109.2(5)  | C29  | C26  | C25              | 120.9(9)  |

|     |     |                  |          |     |     |     |           |
|-----|-----|------------------|----------|-----|-----|-----|-----------|
| O7  | P2  | O5               | 106.2(5) | C29 | C26 | C27 | 118.7(9)  |
| O15 | P3  | O14              | 105.4(5) | C27 | C26 | C25 | 120.3(10) |
| O16 | P3  | O15              | 112.2(5) | C10 | C9  | C6  | 119.7(9)  |
| O16 | P3  | O13              | 114.3(5) | C19 | C16 | C15 | 121.8(8)  |
| O16 | P3  | O14              | 109.4(4) | C19 | C16 | C17 | 116.4(8)  |
| O13 | P3  | O15              | 109.1(4) | C17 | C16 | C15 | 121.8(8)  |
| O13 | P3  | O14              | 106.0(6) | C34 | C35 | C36 | 127.0(10) |
| O12 | P4  | O11              | 108.9(4) | C34 | C35 | C32 | 115.0(9)  |
| O12 | P4  | O9               | 114.5(5) | C32 | C35 | C36 | 118.0(9)  |
| O12 | P4  | O10              | 108.1(6) | C24 | C23 | N6  | 124.3(10) |
| O9  | P4  | O11              | 111.7(5) | C37 | C36 | C35 | 127.5(10) |
| O9  | P4  | O10              | 109.2(4) | C37 | C36 | C39 | 115.3(9)  |
| O10 | P4  | O11              | 103.8(5) | C39 | C36 | C35 | 117.1(9)  |
| O2  | P1  | O4               | 107.0(5) | C35 | C34 | C33 | 124.6(11) |
| O2  | P1  | O3               | 110.5(4) | C26 | C29 | C30 | 119.5(9)  |
| O4  | P1  | O3               | 109.7(6) | N2  | C1  | C2  | 124.1(8)  |
| O1  | P1  | O2               | 112.2(6) | N8  | C40 | C39 | 125.9(11) |
| O1  | P1  | O4               | 109.4(4) | C23 | C24 | C25 | 120.4(10) |
| O1  | P1  | O3               | 108.1(5) | N4  | C20 | C19 | 123.4(8)  |
| P2  | O8  | Cu1              | 121.8(4) | C24 | C25 | C26 | 121.5(10) |
| P3  | O13 | Cu2              | 115.8(5) | C22 | C25 | C26 | 123.0(10) |
| C10 | N1  | Cu1              | 124.1(6) | C22 | C25 | C24 | 115.5(9)  |
| C10 | N1  | C8               | 117.3(8) | C15 | C12 | C11 | 120.7(9)  |
| C8  | N1  | Cu1              | 118.5(7) | N3  | C13 | C14 | 123.8(9)  |
| P4  | O12 | Cu3              | 115.4(5) | N5  | C30 | C29 | 121.8(10) |
| C11 | N3  | Cu2              | 121.1(6) | C1  | C2  | C5  | 118.2(8)  |
| C13 | N3  | Cu2              | 121.5(6) | C6  | C7  | C8  | 120.1(9)  |
| C13 | N3  | C11              | 117.2(8) | C31 | C32 | C35 | 120.2(11) |
| C33 | N7  | Cu3              | 120.1(7) | N2  | C3  | C4  | 121.9(9)  |
| C33 | N7  | C31              | 117.7(9) | C18 | C17 | C16 | 117.9(10) |
| C31 | N7  | Cu3              | 122.0(7) | N8  | C38 | C37 | 124.3(11) |
| C1  | N2  | Cu2              | 119.3(6) | N7  | C33 | C34 | 120.4(10) |
| C1  | N2  | C3               | 116.3(8) | C36 | C37 | C38 | 120.9(11) |
| C3  | N2  | Cu2              | 124.2(6) | C13 | C14 | C15 | 120.1(9)  |
| C20 | N4  | Cu1 <sup>2</sup> | 119.2(6) | C28 | C27 | C26 | 117.9(11) |
| C18 | N4  | Cu1 <sup>2</sup> | 125.5(7) | N5  | C28 | C27 | 124.9(11) |
| C18 | N4  | C20              | 115.3(8) | C40 | C39 | C36 | 117.6(10) |
| C30 | N5  | Cu4              | 121.2(8) | C32 | C31 | N7  | 122.1(11) |
| C28 | N5  | Cu4              | 121.6(7) | C5  | C4  | C3  | 123.0(9)  |
| C28 | N5  | C30              | 117.1(9) | N1  | C8  | C7  | 122.6(9)  |
| C23 | N6  | Cu3              | 122.3(7) | N6  | C21 | C22 | 123.5(13) |
| C21 | N6  | Cu3              | 122.8(8) | N4  | C18 | C17 | 126.2(10) |
| C21 | N6  | C23              | 114.7(9) | C25 | C22 | C21 | 121.6(12) |
| C12 | C15 | C16              | 122.1(9) |     |     |     |           |

**High temperature**

|      |     |      |            |     |    |                  |            |
|------|-----|------|------------|-----|----|------------------|------------|
| O2   | Cu1 | O21  | 60.10(10)  | O21 | P1 | O1A              | 109.7(3)   |
| N1   | Cu1 | O2   | 102.79(8)  | O2  | P1 | O1A <sup>1</sup> | 109.7(3)   |
| N1   | Cu1 | O21  | 102.02(8)  | O21 | P1 | O1A <sup>1</sup> | 104.8(10)  |
| N11  | Cu1 | O2   | 102.02(8)  | O2  | P1 | O1A              | 104.8(10)  |
| N11  | Cu1 | O21  | 102.79(8)  | O21 | P1 | O2               | 110.8(2)   |
| N11  | Cu1 | N1   | 151.27(13) | P1  | O2 | Cu1              | 94.57(12)  |
| O1A1 | P1  | O1A  | 117(2)     | C1  | N1 | Cu1              | 122.39(18) |
| O1B  | P1  | O1A1 | 96(3)      | C5  | N1 | Cu1              | 120.73(16) |
| O1B1 | P1  | O1A1 | 24.4(10)   | C5  | N1 | C1               | 116.8(2)   |
| O1B1 | P1  | O1A  | 96(3)      | N1  | C1 | C2               | 123.0(2)   |
| O1B  | P1  | O1A  | 24.4(10)   | C1  | C2 | C3               | 120.3(2)   |
| O1B1 | P1  | O1B  | 80(2)      | C2  | C3 | C3 <sup>2</sup>  | 121.7(3)   |
| O1B1 | P1  | O21  | 127(2)     | C2  | C3 | C4               | 116.3(2)   |
| O1B  | P1  | O21  | 106.1(10)  | C4  | C3 | C3 <sup>2</sup>  | 121.9(2)   |
| O1B  | P1  | O2   | 127(2)     | C5  | C4 | C3               | 120.2(2)   |
| O1B1 | P1  | O2   | 106.1(10)  | N1  | C5 | C4               | 123.2(2)   |

Symmetry codes: low temperature: <sup>1</sup>+X,1+Y,-1+Z; <sup>2</sup>+X,-1+Y,1+Z; high temperature: <sup>1</sup>1-X,+Y,3/2-Z; <sup>2</sup>2-X,2-Y,1-Z

**Table S6.** Fractional Atomic Coordinates ( $\times 10^4$ ) and Equivalent Isotropic Displacement Parameters ( $\text{\AA}^2 \times 10^3$ ) for crystallographic data collected different temperatures.

| Atom                   | x           | y          | z          | U(eq)    |
|------------------------|-------------|------------|------------|----------|
| <b>Low temperature</b> |             |            |            |          |
| Cu1                    | -1255.1(16) | 6489.3(8)  | -129.4(8)  | 30.3(4)  |
| Cu2                    | 1301.9(18)  | 1468.0(9)  | 4838.9(8)  | 35.4(4)  |
| Cu3                    | -1196(2)    | 3662.7(9)  | 5013.8(9)  | 41.5(4)  |
| Cu4                    | 1345(2)     | 8705.8(9)  | 46.0(9)    | 46.3(5)  |
| P2                     | -4969(3)    | 6274.6(13) | -86.6(14)  | 28.4(5)  |
| P3                     | 5028(3)     | 1289.8(13) | 4941.8(14) | 29.9(5)  |
| P4                     | -4839(3)    | 3725.9(13) | 5096.3(16) | 31.5(6)  |
| P1                     | 5048(3)     | 1262.5(14) | -15.4(16)  | 35.4(6)  |
| O8                     | -3649(7)    | 6764(4)    | 123(4)     | 27.4(13) |
| O6                     | -5500(7)    | 5600(4)    | 570(4)     | 30.4(14) |
| O15                    | 6285(9)     | 1880(4)    | 4563(5)    | 47(2)    |
| O7                     | -4458(10)   | 5921(4)    | -782(4)    | 47(2)    |
| O16                    | 5616(10)    | 613(4)     | 5565(4)    | 44.9(19) |
| O13                    | 3748(8)     | 1771(4)    | 5201(5)    | 51(2)    |
| N1                     | -691(9)     | 5554(4)    | 671(5)     | 30.0(17) |
| O12                    | -3625(10)   | 3328(4)    | 4742(5)    | 50(2)    |
| O2                     | 5959(10)    | 834(4)     | -534(5)    | 53(2)    |
| N3                     | 794(9)      | 535(5)     | 5652(4)    | 27.5(16) |
| N7                     | -780(9)     | 2769(5)    | 5875(5)    | 30.9(17) |
| O14                    | 4372(13)    | 943(4)     | 4270(5)    | 68(3)    |
| O4                     | 4102(11)    | 1918(5)    | -556(5)    | 54(2)    |
| N2                     | 963(8)      | 2339(4)    | 3961(4)    | 25.7(16) |

|     |           |          |         |          |
|-----|-----------|----------|---------|----------|
| O11 | -5829(10) | 3057(5)  | 5628(5) | 51(2)    |
| N4  | -915(8)   | -2624(4) | 8981(4) | 26.0(16) |
| O9  | -5790(10) | 4332(4)  | 4511(5) | 51(2)    |
| O10 | -4104(12) | 4167(4)  | 5670(5) | 58(2)    |
| N5  | 908(12)   | 7810(5)  | 902(5)  | 43(2)    |
| O5  | -6319(9)  | 6854(5)  | -391(6) | 59(3)    |
| O3  | 4004(10)  | 656(5)   | 528(5)  | 51(2)    |
| N6  | -773(10)  | 4586(5)  | 4198(5) | 36.3(19) |
| O1  | 6053(11)  | 1655(4)  | 484(6)  | 63(3)    |
| C15 | 101(11)   | -742(5)  | 6941(5) | 26.1(18) |
| C10 | 723(10)   | 5363(5)  | 888(5)  | 27.0(19) |
| C19 | 868(10)   | -1836(6) | 8089(5) | 29.1(19) |
| C6  | -48(10)   | 4245(5)  | 1926(5) | 26.2(18) |
| C11 | -650(11)  | 365(6)   | 5872(6) | 34(2)    |
| N8  | 937(11)   | -390(5)  | 9205(5) | 41(2)    |
| C5  | 358(9)    | 3594(5)  | 2625(5) | 22.2(17) |
| C26 | 248(12)   | 6541(5)  | 2197(5) | 31(2)    |
| C9  | 1105(10)  | 4737(6)  | 1496(5) | 29.0(19) |
| C16 | -250(11)  | -1397(5) | 7639(5) | 28.1(19) |
| C35 | -95(12)   | 1541(5)  | 7198(6) | 32(2)    |
| C23 | 667(12)   | 4826(6)  | 3982(6) | 37(2)    |
| C36 | 161(12)   | 875(5)   | 7891(5) | 31(2)    |
| C34 | 956(13)   | 1991(6)  | 6746(6) | 38(2)    |
| C29 | 1738(12)  | 6743(6)  | 1985(6) | 35(2)    |
| C1  | -471(11)  | 2561(6)  | 3747(6) | 35(2)    |
| C40 | 1970(13)  | 66(7)    | 8790(7) | 45(3)    |
| C24 | 1025(12)  | 5432(6)  | 3362(6) | 36(2)    |
| C20 | 515(10)   | -2432(6) | 8740(6) | 31(2)    |
| C25 | -117(13)  | 5871(6)  | 2892(6) | 38(2)    |
| C12 | -1019(12) | -271(6)  | 6504(6) | 37(2)    |
| C13 | 1872(11)  | 65(6)    | 6067(6) | 37(2)    |
| C30 | 2038(12)  | 7368(6)  | 1331(6) | 38(2)    |
| C2  | -848(10)  | 3169(6)  | 3103(6) | 34(2)    |
| C7  | -1494(11) | 4416(7)  | 1675(7) | 43(3)    |
| C32 | -1613(15) | 1732(6)  | 6957(6) | 44(3)    |
| C3  | 2068(12)  | 2726(7)  | 3480(7) | 47(3)    |
| C17 | -1742(13) | -1585(7) | 7888(6) | 47(3)    |
| C38 | -444(15)  | -212(6)  | 8998(6) | 45(3)    |
| C33 | 657(12)   | 2595(6)  | 6107(7) | 39(2)    |
| C37 | -873(14)  | 425(6)   | 8347(6) | 43(3)    |
| C14 | 1572(11)  | -566(6)  | 6696(6) | 38(2)    |
| C27 | -912(15)  | 6995(6)  | 1756(6) | 45(3)    |
| C28 | -517(14)  | 7602(6)  | 1125(6) | 42(3)    |
| C39 | 1721(13)  | 690(7)   | 8129(7) | 48(3)    |
| C31 | -1905(14) | 2328(6)  | 6311(6) | 44(3)    |

|                         |           |            |          |         |
|-------------------------|-----------|------------|----------|---------|
| C4                      | 1761(11)  | 3352(7)    | 2843(7)  | 50(3)   |
| C8                      | -1790(11) | 5080(7)    | 1062(7)  | 44(3)   |
| C21                     | -1834(17) | 5012(8)    | 3755(8)  | 63(4)   |
| C18                     | -1962(13) | -2192(7)   | 8560(7)  | 49(3)   |
| C22                     | -1535(16) | 5653(7)    | 3116(8)  | 59(3)   |
| <b>High temperature</b> |           |            |          |         |
| Cu1                     | 5000      | 8388.2(6)  | 7500     | 69.1(3) |
| P1                      | 5000      | 4974.9(10) | 7500     | 69.3(3) |
| O1A                     | 3700(40)  | 4010(20)   | 8167(9)  | 87(4)   |
| O1B                     | 4440(60)  | 3690(20)   | 8290(30) | 69(7)   |
| O2                      | 3989(3)   | 5949(3)    | 6164(2)  | 90.3(7) |
| N1                      | 6690(2)   | 8937(2)    | 6509(2)  | 55.6(5) |
| C1                      | 7609(3)   | 7888(3)    | 6045(4)  | 72.6(7) |
| C2                      | 8892(4)   | 8263(3)    | 5442(4)  | 69.8(7) |
| C3                      | 9295(2)   | 9777(2)    | 5303(2)  | 49.2(5) |
| C4                      | 8319(3)   | 10857(3)   | 5753(3)  | 57.0(5) |
| C5                      | 7052(3)   | 10401(3)   | 6342(3)  | 57.4(5) |

U<sub>eq</sub> is defined as 1/3 of the trace of the orthogonalised U<sub>ij</sub> tensor

**Table S7.** Anisotropic Displacement Parameters ( $\text{\AA}^2 \times 10^3$ ) for crystallographic data at different temperatures.

| Atom                   | U <sub>11</sub> | U <sub>22</sub> | U <sub>33</sub> | U <sub>23</sub> | U <sub>13</sub> | U <sub>12</sub> |
|------------------------|-----------------|-----------------|-----------------|-----------------|-----------------|-----------------|
| <b>Low temperature</b> |                 |                 |                 |                 |                 |                 |
| Cu1                    | 37.6(8)         | 20.7(7)         | 27.1(7)         | 5.7(5)          | -0.2(6)         | -0.9(5)         |
| Cu2                    | 42.7(9)         | 28.0(7)         | 27.4(7)         | 9.2(6)          | 3.2(6)          | -0.3(6)         |
| Cu3                    | 58.1(11)        | 30.3(8)         | 27.9(8)         | 9.3(6)          | -2.4(7)         | -3.8(7)         |
| Cu4                    | 63.8(11)        | 27.7(8)         | 37.5(9)         | 12.2(7)         | -0.4(8)         | 5.1(7)          |
| P2                     | 34.9(13)        | 17.2(10)        | 32.7(12)        | -5.3(9)         | -6.7(10)        | -1.0(9)         |
| P3                     | 38.8(14)        | 17.6(10)        | 31.4(12)        | -2.2(9)         | 2.1(10)         | -7.2(9)         |
| P4                     | 32.6(13)        | 16.7(10)        | 43.9(14)        | -4.8(10)        | 2.8(10)         | -1.5(9)         |
| P1                     | 47.5(15)        | 16.8(10)        | 40.3(14)        | -3.6(10)        | -5.6(11)        | 5.4(10)         |
| O8                     | 25(3)           | 24(3)           | 35(3)           | -10(3)          | -1(3)           | -4(2)           |
| O6                     | 27(3)           | 27(3)           | 37(4)           | -9(3)           | 14(3)           | -6(3)           |
| O15                    | 47(5)           | 30(4)           | 69(5)           | -19(4)          | 28(4)           | -8(3)           |
| O7                     | 84(6)           | 27(4)           | 27(4)           | -2(3)           | 6(4)            | 0(4)            |
| O16                    | 81(6)           | 24(3)           | 32(4)           | -11(3)          | -8(4)           | 8(3)            |
| O13                    | 31(4)           | 28(4)           | 85(6)           | 2(4)            | 9(4)            | 0(3)            |
| N1                     | 33(4)           | 20(4)           | 35(4)           | -2(3)           | 5(3)            | 5(3)            |
| O12                    | 64(5)           | 19(3)           | 66(5)           | -11(3)          | 30(4)           | -3(3)           |
| O2                     | 56(5)           | 28(4)           | 70(6)           | -3(4)           | 24(4)           | 12(3)           |
| N3                     | 30(4)           | 27(4)           | 18(3)           | 10(3)           | 2(3)            | -4(3)           |
| N7                     | 33(4)           | 26(4)           | 30(4)           | 2(3)            | 8(3)            | -2(3)           |
| O14                    | 118(8)          | 17(3)           | 64(6)           | 1(4)            | -52(6)          | -3(4)           |
| O4                     | 79(6)           | 31(4)           | 56(5)           | -21(4)          | -27(5)          | 25(4)           |

|     |       |       |        |        |        |        |
|-----|-------|-------|--------|--------|--------|--------|
| N2  | 14(3) | 29(4) | 30(4)  | -1(3)  | 2(3)   | 0(3)   |
| O11 | 56(5) | 32(4) | 61(5)  | -5(4)  | 23(4)  | -7(4)  |
| N4  | 27(4) | 15(3) | 30(4)  | 6(3)   | 2(3)   | 5(3)   |
| O9  | 68(6) | 26(4) | 55(5)  | -5(3)  | -22(4) | 12(4)  |
| O10 | 88(7) | 23(4) | 60(5)  | -3(4)  | -27(5) | 4(4)   |
| N5  | 82(7) | 20(4) | 25(4)  | -1(3)  | -13(4) | -2(4)  |
| O5  | 36(4) | 35(4) | 112(8) | -30(5) | -46(5) | 16(3)  |
| O3  | 56(5) | 42(4) | 67(5)  | -38(4) | 14(4)  | -11(4) |
| N6  | 48(5) | 25(4) | 35(4)  | -6(3)  | -2(4)  | 4(4)   |
| O1  | 81(7) | 25(4) | 80(6)  | -4(4)  | -48(5) | 7(4)   |
| C15 | 33(5) | 17(4) | 25(4)  | 1(3)   | -5(4)  | 0(3)   |
| C10 | 23(4) | 27(4) | 27(4)  | 1(4)   | 6(3)   | 5(3)   |
| C19 | 23(4) | 32(5) | 30(5)  | -3(4)  | -6(4)  | -4(4)  |
| C6  | 18(4) | 27(4) | 30(5)  | -1(4)  | 1(3)   | 5(3)   |
| C11 | 33(5) | 25(5) | 38(5)  | 5(4)   | -3(4)  | 2(4)   |
| N8  | 61(6) | 21(4) | 32(4)  | 10(3)  | -13(4) | -4(4)  |
| C5  | 11(4) | 23(4) | 27(4)  | 4(3)   | 6(3)   | 2(3)   |
| C26 | 50(6) | 16(4) | 26(5)  | -2(3)  | 1(4)   | 7(4)   |
| C9  | 20(4) | 32(5) | 33(5)  | -5(4)  | 5(4)   | -3(4)  |
| C16 | 31(5) | 18(4) | 31(5)  | 4(4)   | 6(4)   | -3(3)  |
| C35 | 40(6) | 23(4) | 32(5)  | -7(4)  | -1(4)  | 5(4)   |
| C23 | 43(6) | 35(5) | 29(5)  | -2(4)  | -5(4)  | -1(4)  |
| C36 | 43(6) | 24(4) | 26(5)  | -7(4)  | 3(4)   | -9(4)  |
| C34 | 46(6) | 39(6) | 26(5)  | -1(4)  | -4(4)  | -9(5)  |
| C29 | 33(5) | 31(5) | 37(5)  | 3(4)   | -13(4) | 6(4)   |
| C1  | 24(5) | 39(5) | 32(5)  | 10(4)  | 2(4)   | -6(4)  |
| C40 | 37(6) | 38(6) | 47(6)  | 12(5)  | 1(5)   | 8(5)   |
| C24 | 42(6) | 37(5) | 27(5)  | 0(4)   | -5(4)  | -9(4)  |
| C20 | 20(4) | 31(5) | 38(5)  | 2(4)   | -12(4) | -3(4)  |
| C25 | 59(7) | 21(4) | 31(5)  | -1(4)  | 5(5)   | -8(4)  |
| C12 | 33(5) | 36(5) | 33(5)  | 8(4)   | 6(4)   | 3(4)   |
| C13 | 19(4) | 45(6) | 38(5)  | 7(4)   | 3(4)   | 9(4)   |
| C30 | 38(6) | 31(5) | 38(5)  | 4(4)   | 8(4)   | 4(4)   |
| C2  | 11(4) | 35(5) | 44(6)  | 14(4)  | 11(4)  | 9(4)   |
| C7  | 15(4) | 45(6) | 54(7)  | 18(5)  | -3(4)  | -6(4)  |
| C32 | 74(8) | 23(5) | 30(5)  | 7(4)   | 7(5)   | -5(5)  |
| C3  | 23(5) | 49(6) | 50(7)  | 24(5)  | 0(4)   | -9(4)  |
| C17 | 48(6) | 36(6) | 38(6)  | 27(5)  | 6(5)   | 11(5)  |
| C38 | 74(9) | 33(5) | 25(5)  | -3(4)  | 8(5)   | -4(5)  |
| C33 | 33(5) | 32(5) | 48(6)  | -5(5)  | 6(4)   | 3(4)   |
| C37 | 54(7) | 32(5) | 35(6)  | 8(4)   | -1(5)  | 6(5)   |
| C14 | 21(5) | 37(5) | 47(6)  | 8(5)   | 5(4)   | 5(4)   |
| C27 | 68(8) | 22(5) | 37(6)  | 6(4)   | 10(5)  | -2(5)  |
| C28 | 59(7) | 31(5) | 28(5)  | 8(4)   | 3(5)   | -3(5)  |
| C39 | 41(6) | 45(6) | 47(7)  | 9(5)   | 1(5)   | 9(5)   |

|                         |           |          |          |          |          |          |
|-------------------------|-----------|----------|----------|----------|----------|----------|
| C31                     | 52(7)     | 34(5)    | 40(6)    | 4(5)     | 6(5)     | -1(5)    |
| C4                      | 17(5)     | 55(7)    | 56(7)    | 27(6)    | -5(4)    | -4(4)    |
| C8                      | 18(5)     | 42(6)    | 58(7)    | 14(5)    | 1(4)     | -6(4)    |
| C21                     | 70(7)     | 47(6)    | 59(6)    | 14(5)    | 6(6)     | -18(5)   |
| C18                     | 34(5)     | 48(6)    | 48(6)    | 23(5)    | 1(4)     | -4(4)    |
| C22                     | 60(6)     | 43(6)    | 56(6)    | 24(5)    | -6(5)    | 0(5)     |
| <b>High temperature</b> |           |          |          |          |          |          |
| Cu1                     | 66.5(4)   | 58.2(4)  | 101.2(5) | 0        | 54.6(3)  | 0        |
| P1                      | 122.6(8)  | 42.2(4)  | 56.8(5)  | 0        | 47.5(5)  | 0        |
| O1A                     | 117(10)   | 87(4)    | 60(2)    | 2(2)     | 30(3)    | -40(6)   |
| O1B                     | 98(15)    | 55(6)    | 62(5)    | -9(3)    | 36(7)    | -28(6)   |
| O2                      | 136.3(19) | 78.5(13) | 75.6(12) | 16.3(10) | 62.3(12) | 37.8(13) |
| N1                      | 54.6(10)  | 52.3(11) | 69.0(12) | -0.8(8)  | 32.0(9)  | -2.5(8)  |
| C1                      | 80.5(17)  | 49.1(12) | 109(2)   | -4.7(13) | 60.2(16) | -7.3(12) |
| C2                      | 79.2(17)  | 48.4(13) | 103(2)   | -6.9(12) | 60.4(16) | -1.9(11) |
| C3                      | 50.2(11)  | 51.1(11) | 51.9(10) | 0.9(9)   | 23.5(9)  | -2.2(9)  |
| C4                      | 55.6(12)  | 46.5(11) | 76.7(14) | 6.1(10)  | 31.4(11) | 1.5(9)   |
| C5                      | 53.4(11)  | 52.0(12) | 74.2(14) | 3.1(10)  | 30.1(10) | 6.5(10)  |

The Anisotropic displacement factor exponent takes the form:  $-2\pi^2[h^2a^*U_{11}+2hka^*b^*U_{12}+\dots]$ .

**Table S8.** Bond lengths for crystallographic data at different temperatures.

| Atom                   | Atom            | Length (Å) | Atom | Atom | Length (Å) |
|------------------------|-----------------|------------|------|------|------------|
| <b>Low temperature</b> |                 |            |      |      |            |
| Cu1                    | O8              | 2.241(6)   | N6   | C21  | 1.326(16)  |
| Cu1                    | N1              | 1.925(8)   | C15  | C16  | 1.483(11)  |
| Cu1                    | N4 <sup>1</sup> | 1.922(7)   | C15  | C12  | 1.390(13)  |
| Cu2                    | O13             | 2.356(8)   | C15  | C14  | 1.385(13)  |
| Cu2                    | N3              | 1.919(7)   | C10  | C9   | 1.362(13)  |
| Cu2                    | N2              | 1.895(7)   | C19  | C16  | 1.377(13)  |
| Cu3                    | O12             | 2.310(9)   | C19  | C20  | 1.374(13)  |
| Cu3                    | N7              | 1.912(8)   | C6   | C5   | 1.494(12)  |
| Cu3                    | N6              | 1.896(8)   | C6   | C9   | 1.419(12)  |
| Cu4                    | N5              | 1.910(8)   | C6   | C7   | 1.367(13)  |
| Cu4                    | N8 <sup>1</sup> | 1.899(8)   | C11  | C12  | 1.394(13)  |
| P2                     | O8              | 1.531(6)   | N8   | C40  | 1.305(14)  |
| P2                     | O6              | 1.498(6)   | N8   | C38  | 1.295(16)  |
| P2                     | O7              | 1.559(8)   | C5   | C2   | 1.444(11)  |
| P2                     | O5              | 1.562(7)   | C5   | C4   | 1.339(12)  |
| P3                     | O15             | 1.540(7)   | C26  | C29  | 1.393(15)  |
| P3                     | O16             | 1.485(7)   | C26  | C25  | 1.497(13)  |
| P3                     | O13             | 1.531(8)   | C26  | C27  | 1.406(15)  |
| P3                     | O14             | 1.560(8)   | C16  | C17  | 1.407(14)  |
| P4                     | O12             | 1.486(8)   | C35  | C36  | 1.474(13)  |
| P4                     | O11             | 1.559(8)   | C35  | C34  | 1.340(14)  |

|                         |                  |            |     |                 |           |
|-------------------------|------------------|------------|-----|-----------------|-----------|
| P4                      | O9               | 1.529(8)   | C35 | C32             | 1.427(16) |
| P4                      | O10              | 1.543(9)   | C23 | C24             | 1.348(14) |
| P1                      | O2               | 1.530(8)   | C36 | C37             | 1.333(14) |
| P1                      | O4               | 1.533(8)   | C36 | C39             | 1.460(15) |
| P1                      | O3               | 1.538(9)   | C34 | C33             | 1.358(14) |
| P1                      | O1               | 1.519(8)   | C29 | C30             | 1.394(13) |
| N1                      | C10              | 1.330(12)  | C1  | C2              | 1.384(13) |
| N1                      | C8               | 1.345(12)  | C40 | C39             | 1.395(14) |
| N3                      | C11              | 1.349(12)  | C24 | C25             | 1.407(15) |
| N3                      | C13              | 1.347(12)  | C25 | C22             | 1.343(17) |
| N7                      | C33              | 1.351(13)  | C13 | C14             | 1.371(14) |
| N7                      | C31              | 1.369(13)  | C7  | C8              | 1.389(14) |
| N2                      | C1               | 1.356(12)  | C32 | C31             | 1.358(14) |
| N2                      | C3               | 1.359(12)  | C3  | C4              | 1.380(14) |
| N4                      | C20              | 1.352(12)  | C17 | C18             | 1.388(13) |
| N4                      | C18              | 1.303(13)  | C38 | C37             | 1.429(14) |
| N5                      | C30              | 1.370(14)  | C27 | C28             | 1.371(13) |
| N5                      | C28              | 1.346(15)  | C21 | C22             | 1.393(15) |
| N6                      | C23              | 1.367(14)  |     |                 |           |
| <b>High temperature</b> |                  |            |     |                 |           |
| Cu1                     | O2               | 2.460(3)   | P1  | O2 <sup>1</sup> | 1.497(2)  |
| Cu1                     | O2 <sup>1</sup>  | 2.460(3)   | N1  | C1              | 1.338(3)  |
| Cu1                     | N1 <sup>1</sup>  | 1.9299(18) | N1  | C5              | 1.332(3)  |
| Cu1                     | N1               | 1.9299(18) | C1  | C2              | 1.377(4)  |
| P1                      | O1A <sup>1</sup> | 1.624(17)  | C2  | C3              | 1.380(3)  |
| P1                      | O1A              | 1.624(17)  | C3  | C3 <sup>2</sup> | 1.493(4)  |
| P1                      | O1B <sup>1</sup> | 1.457(13)  | C3  | C4              | 1.384(3)  |
| P1                      | O1B              | 1.457(13)  | C4  | C5              | 1.376(3)  |
| P1                      | O2               | 1.497(2)   |     |                 |           |

Symmetry codes: <sup>1</sup>+X,1+Y,-1+Z, <sup>2</sup>1-X,+Y,3/2-Z

**Table S9.** Torsion angles for crystallographic data at different temperatures.

| A                      | B  | C   | D   | Angle (°)  | A   | B   | C   | D   | Angle (°)  |
|------------------------|----|-----|-----|------------|-----|-----|-----|-----|------------|
| <b>Low temperature</b> |    |     |     |            |     |     |     |     |            |
| Cu1                    | N1 | C10 | C9  | 174.6(7)   | C16 | C15 | C12 | C11 | 177.0(10)  |
| Cu1                    | N1 | C8  | C7  | -176.7(10) | C16 | C15 | C14 | C13 | -177.3(10) |
| Cu1 <sup>1</sup>       | N4 | C20 | C19 | 176.7(8)   | C16 | C19 | C20 | N4  | -0.2(16)   |
| Cu1 <sup>1</sup>       | N4 | C18 | C17 | -175.5(11) | C16 | C17 | C18 | N4  | -2(2)      |
| Cu2                    | N3 | C11 | C12 | -174.6(8)  | C35 | C36 | C37 | C38 | 179.2(10)  |
| Cu2                    | N3 | C13 | C14 | 174.3(9)   | C35 | C36 | C39 | C40 | 179.2(10)  |
| Cu2                    | N2 | C1  | C2  | -177.8(9)  | C35 | C34 | C33 | N7  | -1.6(17)   |
| Cu2                    | N2 | C3  | C4  | 179.3(10)  | C35 | C32 | C31 | N7  | -0.6(17)   |
| Cu3                    | N7 | C33 | C34 | 176.2(8)   | C23 | N6  | C21 | C22 | 0(2)       |
| Cu3                    | N7 | C31 | C32 | -175.0(9)  | C23 | C24 | C25 | C26 | -179.4(10) |

|                  |     |     |     |            |     |     |     |     |            |
|------------------|-----|-----|-----|------------|-----|-----|-----|-----|------------|
| Cu3              | N6  | C23 | C24 | 173.7(8)   | C23 | C24 | C25 | C22 | 1.2(16)    |
| Cu3              | N6  | C21 | C22 | -174.8(11) | C36 | C35 | C34 | C33 | 179.3(10)  |
| Cu4              | N5  | C30 | C29 | 176.2(8)   | C36 | C35 | C32 | C31 | -178.4(10) |
| Cu4              | N5  | C28 | C27 | -176.5(9)  | C34 | C35 | C36 | C37 | 179.8(11)  |
| Cu4 <sup>1</sup> | N8  | C40 | C39 | 174.2(10)  | C34 | C35 | C36 | C39 | 1.7(15)    |
| Cu4 <sup>1</sup> | N8  | C38 | C37 | -176.2(9)  | C34 | C35 | C32 | C31 | 0.2(15)    |
| O6               | P2  | O8  | Cu1 | 95.8(5)    | C29 | C26 | C25 | C24 | 0.9(15)    |
| O15              | P3  | O13 | Cu2 | 131.8(5)   | C29 | C26 | C25 | C22 | -179.7(12) |
| O7               | P2  | O8  | Cu1 | -26.1(5)   | C29 | C26 | C27 | C28 | 1.7(15)    |
| O16              | P3  | O13 | Cu2 | -101.8(5)  | C1  | N2  | C3  | C4  | 4.9(18)    |
| O13              | Cu2 | N2  | C1  | -156.3(8)  | C40 | N8  | C38 | C37 | 1.6(17)    |
| O13              | Cu2 | N2  | C3  | 29.4(10)   | C24 | C25 | C22 | C21 | -2(2)      |
| N1               | C10 | C9  | C6  | 0.7(15)    | C20 | N4  | C18 | C17 | 2.3(19)    |
| O12              | Cu3 | N6  | C23 | -158.2(8)  | C20 | C19 | C16 | C15 | 179.0(9)   |
| O12              | Cu3 | N6  | C21 | 16.4(11)   | C20 | C19 | C16 | C17 | 0.8(15)    |
| N3               | Cu2 | N2  | C1  | 13.7(14)   | C25 | C26 | C29 | C30 | 179.7(9)   |
| N3               | Cu2 | N2  | C3  | -160.6(10) | C25 | C26 | C27 | C28 | 179.9(10)  |
| N3               | C11 | C12 | C15 | 1.4(17)    | C12 | C15 | C16 | C19 | -177.0(10) |
| N3               | C13 | C14 | C15 | -0.8(18)   | C12 | C15 | C16 | C17 | 1.1(15)    |
| N7               | Cu3 | N6  | C23 | 8.4(15)    | C12 | C15 | C14 | C13 | 2.2(16)    |
| N7               | Cu3 | N6  | C21 | -177.0(11) | C13 | N3  | C11 | C12 | 0.1(15)    |
| O14              | P3  | O13 | Cu2 | 18.9(6)    | C30 | N5  | C28 | C27 | 1.4(17)    |
| N2               | C1  | C2  | C5  | 0.2(17)    | C2  | C5  | C4  | C3  | 0.9(19)    |
| N2               | C3  | C4  | C5  | -4(2)      | C7  | C6  | C5  | C2  | -5.7(15)   |
| O11              | P4  | O12 | Cu3 | -121.0(5)  | C7  | C6  | C5  | C4  | 172.7(12)  |
| O9               | P4  | O12 | Cu3 | 113.0(5)   | C7  | C6  | C9  | C10 | 2.7(15)    |
| O10              | P4  | O12 | Cu3 | -8.8(6)    | C32 | C35 | C36 | C37 | -1.8(16)   |
| O5               | P2  | O8  | Cu1 | -141.3(5)  | C32 | C35 | C36 | C39 | -179.9(10) |
| N6               | C23 | C24 | C25 | 0.7(17)    | C32 | C35 | C34 | C33 | 0.8(16)    |
| N6               | C21 | C22 | C25 | 2(2)       | C3  | N2  | C1  | C2  | -3.0(16)   |
| C15              | C16 | C17 | C18 | -178.2(11) | C38 | N8  | C40 | C39 | -3.6(19)   |
| C10              | N1  | C8  | C7  | 0.3(17)    | C33 | N7  | C31 | C32 | -0.1(16)   |
| C19              | C16 | C17 | C18 | 0.0(17)    | C37 | C36 | C39 | C40 | 0.9(16)    |
| C6               | C5  | C2  | C1  | 179.4(9)   | C14 | C15 | C16 | C19 | 2.5(15)    |
| C6               | C5  | C4  | C3  | -177.5(12) | C14 | C15 | C16 | C17 | -179.4(11) |
| C6               | C7  | C8  | N1  | 3(2)       | C14 | C15 | C12 | C11 | -2.5(15)   |
| C11              | N3  | C13 | C14 | -0.4(16)   | C27 | C26 | C29 | C30 | -2.1(15)   |
| N8               | C40 | C39 | C36 | 2(2)       | C27 | C26 | C25 | C24 | -177.2(10) |
| N8               | C38 | C37 | C36 | 1.6(18)    | C27 | C26 | C25 | C22 | 2.2(16)    |
| C5               | C6  | C9  | C10 | -175.8(9)  | C28 | N5  | C30 | C29 | -1.7(15)   |
| C5               | C6  | C7  | C8  | 174.0(11)  | C39 | C36 | C37 | C38 | -2.6(16)   |
| C26              | C29 | C30 | N5  | 2.2(16)    | C31 | N7  | C33 | C34 | 1.1(15)    |
| C26              | C25 | C22 | C21 | 178.3(12)  | C4  | C5  | C2  | C1  | 0.9(16)    |
| C26              | C27 | C28 | N5  | -1.4(17)   | C8  | N1  | C10 | C9  | -2.2(15)   |
| C9               | C6  | C5  | C2  | 172.7(9)   | C21 | N6  | C23 | C24 | -1.3(16)   |

|                         |    |    |     |            |                 |    |     |                 |           |
|-------------------------|----|----|-----|------------|-----------------|----|-----|-----------------|-----------|
| C9                      | C6 | C5 | C4  | -8.9(16)   | C18             | N4 | C20 | C19             | -1.3(15)  |
| C9                      | C6 | C7 | C8  | -4.4(17)   |                 |    |     |                 |           |
| <b>High temperature</b> |    |    |     |            |                 |    |     |                 |           |
| Cu1                     | N1 | C1 | C2  | -175.3(2)  | C1              | N1 | C5  | C4              | -1.2(4)   |
| Cu1                     | N1 | C5 | C4  | 175.21(18) | C1              | C2 | C3  | C3 <sup>3</sup> | 178.3(3)  |
| O1A                     | P1 | O2 | Cu1 | 118.2(7)   | C1              | C2 | C3  | C4              | -1.8(4)   |
| O1A <sup>2</sup>        | P1 | O2 | Cu1 | -115.2(13) | C2              | C3 | C4  | C5              | 1.7(4)    |
| O1B                     | P1 | O2 | Cu1 | 130.6(11)  | C3 <sup>3</sup> | C3 | C4  | C5              | -178.5(2) |
| O1B <sup>2</sup>        | P1 | O2 | Cu1 | -141(2)    | C3              | C4 | C5  | N1              | -0.2(4)   |
| O2 <sup>3</sup>         | P1 | O2 | Cu1 | 0.000(1)   | C5              | N1 | C1  | C2              | 1.0(4)    |
| N1                      | C1 | C2 | C3  | 0.5(5)     |                 |    |     |                 |           |

Symmetry operations: <sup>1</sup>+X,-1+Y,1+Z, <sup>2</sup>1-X,+Y,3/2-Z; <sup>3</sup>2-X,2-Y,1-Z

**Table S10.** Hydrogen Atom Coordinates ( $\text{\AA} \times 10^4$ ) and Isotropic Displacement Parameters ( $\text{\AA}^2 \times 10^3$ ) for crystallographic data at different temperatures

| Atom                   | x        | y        | z       | U(eq) |
|------------------------|----------|----------|---------|-------|
| <b>Low temperature</b> |          |          |         |       |
| H15                    | 5994.84  | 2360.40  | 4520.33 | 71    |
| H14                    | 4631.40  | 455.70   | 4333.72 | 102   |
| H4A                    | 3520.27  | 2133.88  | -288.67 | 80    |
| H11A                   | -5887.96 | 2653.38  | 5431.37 | 77    |
| H10A                   | -4152.43 | 4671.57  | 5486.65 | 88    |
| H10                    | 1510.92  | 5682.28  | 603.98  | 32    |
| H19                    | 1894.70  | -1726.38 | 7948.69 | 35    |
| H11                    | -1434.53 | 686.23   | 5589.29 | 41    |
| H9                     | 2132.97  | 4630.40  | 1630.72 | 35    |
| H23                    | 1469.64  | 4547.77  | 4287.70 | 44    |
| H34                    | 1982.46  | 1879.12  | 6881.42 | 46    |
| H29                    | 2542.28  | 6458.30  | 2283.26 | 43    |
| H1                     | -1267.90 | 2281.55  | 4059.47 | 42    |
| H40                    | 2985.90  | -36.44   | 8952.41 | 53    |
| H24                    | 2052.72  | 5562.26  | 3241.89 | 44    |
| H20                    | 1316.10  | -2723.92 | 9035.31 | 38    |
| H12                    | -2047.43 | -384.05  | 6637.13 | 44    |
| H13                    | 2893.55  | 175.47   | 5917.44 | 44    |
| H30                    | 3055.88  | 7490.54  | 1179.69 | 45    |
| H2                     | -1871.71 | 3303.19  | 2979.00 | 41    |
| H7                     | -2298.51 | 4079.98  | 1919.87 | 52    |
| H32                    | -2421.79 | 1440.76  | 7249.75 | 53    |
| H3                     | 3084.21  | 2559.42  | 3585.91 | 56    |
| H17                    | -2570.96 | -1306.85 | 7605.45 | 56    |
| H38                    | -1222.84 | -523.53  | 9297.35 | 54    |
| H33                    | 1462.82  | 2896.29  | 5822.56 | 46    |
| H37                    | -1911.42 | 528.89   | 8238.25 | 52    |

|                         |          |          |          |         |
|-------------------------|----------|----------|----------|---------|
| H14A                    | 2376.45  | -882.45  | 6963.35  | 46      |
| H27                     | -1940.56 | 6883.32  | 1891.32  | 54      |
| H28                     | -1307.59 | 7897.89  | 823.22   | 50      |
| H39                     | 2535.96  | 983.36   | 7844.20  | 58      |
| H31                     | -2922.60 | 2441.61  | 6157.50  | 53      |
| H4                      | 2581.93  | 3624.30  | 2545.83  | 60      |
| H8                      | -2807.97 | 5203.31  | 914.13   | 53      |
| H21                     | -2857.06 | 4872.99  | 3879.37  | 76      |
| H18                     | -2973.13 | -2302.33 | 8730.18  | 59      |
| H22                     | -2352.13 | 5941.37  | 2832.08  | 70      |
| <b>High temperature</b> |          |          |          |         |
| H1A                     | 3930(60) | 3920(50) | 9110(60) | 114(14) |
| H1                      | 7370.52  | 6857.24  | 6133.35  | 87      |
| H2                      | 9489.53  | 7491.36  | 5127.12  | 84      |
| H4                      | 8519.19  | 11895.25 | 5656.14  | 68      |
| H5                      | 6418.22  | 11151.29 | 6637.87  | 69      |

**Table S11.** Solvent mask information for crystal refinement in hydrated structure

| Number | X     | Y      | Z     | Volume | Electron count |
|--------|-------|--------|-------|--------|----------------|
| 1      | 0.483 | -0.208 | 0.750 | 204.0  | 51.0           |
| 2      | 0.517 | -0.393 | 0.250 | 204.0  | 50.9           |

b. *MeOH-absorbed crystals*

**Table S13.** Bond angles of MeOH-absorbed crystal.

| Atom | Atom | Atom | Angle (°) | Atom | Atom | Atom             | Angle (°) |
|------|------|------|-----------|------|------|------------------|-----------|
| N1   | Cu1  | O1   | 101.3(3)  | C3   | C5   | C6               | 122.2(7)  |
| N21  | Cu1  | N1   | 156.1(3)  | C10  | C8   | C6               | 120.2(8)  |
| N21  | Cu1  | O1   | 102.5(3)  | C8   | C6   | C5               | 121.3(7)  |
| C1   | N1   | Cu1  | 123.6(6)  | C7   | C6   | C5               | 122.7(7)  |
| C2   | N1   | Cu1  | 119.5(6)  | C7   | C6   | C8               | 116.1(8)  |
| C2   | N1   | C1   | 116.6(7)  | C2   | C4   | C5               | 119.5(8)  |
| O2   | P14  | O4   | 104.9(4)  | N1   | C1   | C3               | 122.7(8)  |
| O3   | P14  | O2   | 110.4(4)  | N2   | C10  | C8               | 123.8(8)  |
| O3   | P14  | O4   | 109.4(3)  | P14  | O1   | Cu1              | 122.8(3)  |
| O3   | P14  | O1   | 114.5(4)  | N1   | C2   | C4               | 124.2(8)  |
| O1   | P14  | O2   | 108.7(4)  | C1   | C3   | C5               | 120.5(8)  |
| O1   | P14  | O4   | 108.5(3)  | C9   | N2   | Cu1 <sup>2</sup> | 122.3(6)  |
| N2   | C9   | C7   | 122.4(8)  | C10  | N2   | Cu1 <sup>2</sup> | 120.8(6)  |
| C4   | C5   | C6   | 121.3(7)  | C10  | N2   | C9               | 116.9(7)  |
| C4   | C5   | C3   | 116.5(8)  | C6   | C7   | C9               | 120.5(8)  |

**Table S14.** Fractional Atomic Coordinates ( $\times 10^4$ ) and Equivalent Isotropic Displacement Parameters ( $\text{\AA}^2 \times 10^3$ ) for crystallographic data of MeOH-absorbed crystal.

| Atom | x          | y          | z          | U(eq)    |
|------|------------|------------|------------|----------|
| Cu1  | 3214.4(11) | 1243.1(11) | 8166.7(13) | 30.7(4)  |
| N1   | 4876(7)    | 716(8)     | 7167(9)    | 28.8(15) |
| P14  | 2946(2)    | 4867(2)    | 7228(3)    | 27.2(4)  |
| C9   | 10700(10)  | -2007(9)   | 4594(12)   | 32.0(18) |
| C5   | 7500(8)    | 53(10)     | 6002(10)   | 26.8(15) |
| C8   | 9801(10)   | 877(10)    | 4962(13)   | 31.9(18) |
| C6   | 8895(9)    | -285(8)    | 5393(11)   | 27.9(16) |
| C4   | 7089(12)   | 1528(11)   | 6267(15)   | 41(2)    |
| C1   | 5261(10)   | -723(10)   | 6898(13)   | 33.4(19) |
| O2   | 2290(10)   | 6227(6)    | 8033(9)    | 44.8(17) |
| O5   | 8673(10)   | 4648(10)   | 5589(11)   | 63(2)    |
| O4   | 4320(7)    | 5543(7)    | 6581(8)    | 37.1(14) |
| O3   | 1748(6)    | 4267(7)    | 5825(8)    | 35.1(13) |
| C10  | 11063(10)  | 532(9)     | 4346(12)   | 33(2)    |
| O1   | 3589(7)    | 3707(6)    | 8540(8)    | 29.5(13) |
| C2   | 5802(11)   | 1793(10)   | 6845(13)   | 40(2)    |
| C3   | 6529(10)   | -1079(9)   | 6336(13)   | 33(2)    |
| C11  | 8020(20)   | 4660(20)   | 3970(20)   | 96(5)    |
| N2   | 11511(8)   | -878(8)    | 4119(10)   | 31.0(16) |

|    |          |           |          |          |
|----|----------|-----------|----------|----------|
| C7 | 9402(10) | -1743(10) | 5238(11) | 32.5(18) |
|----|----------|-----------|----------|----------|

**Table S15.** Anisotropic Displacement Parameters ( $\text{\AA}^2 \times 10^3$ ) for crystallographic data of MeOH-absorbed crystal.

| Atom | U <sub>11</sub> | U <sub>22</sub> | U <sub>33</sub> | U <sub>23</sub> | U <sub>13</sub> | U <sub>12</sub> |
|------|-----------------|-----------------|-----------------|-----------------|-----------------|-----------------|
| Cu1  | 24.6(5)         | 37.8(6)         | 34.9(7)         | -2.4(5)         | 17.2(4)         | -0.8(5)         |
| N1   | 21(3)           | 36(3)           | 32(4)           | -10(3)          | 12(3)           | 0(3)            |
| P14  | 30.3(9)         | 30.9(9)         | 23.7(9)         | 0.2(8)          | 13.2(7)         | 0.2(7)          |
| C9   | 30(4)           | 29(4)           | 42(5)           | 4(3)            | 18(4)           | 1(3)            |
| C5   | 21(3)           | 35(4)           | 28(4)           | 2(3)            | 12(3)           | -5(3)           |
| C8   | 29(4)           | 32(4)           | 42(5)           | 4(4)            | 21(4)           | -1(3)           |
| C6   | 28(4)           | 28(3)           | 32(4)           | -3(3)           | 14(3)           | 0(3)            |
| C4   | 38(5)           | 32(4)           | 61(7)           | -6(4)           | 27(5)           | -1(3)           |
| C1   | 32(4)           | 30(4)           | 42(5)           | -1(3)           | 18(4)           | -1(3)           |
| O2   | 78(5)           | 35(3)           | 28(4)           | 5(2)            | 26(3)           | 20(3)           |
| O5   | 58(3)           | 60(3)           | 71(3)           | 1(2)            | 14(2)           | -2(2)           |
| O4   | 31(3)           | 52(3)           | 29(3)           | 0(3)            | 8(3)            | -14(3)          |
| O3   | 27(3)           | 51(3)           | 30(3)           | -7(3)           | 12(2)           | -8(2)           |
| C10  | 31(4)           | 32(4)           | 42(5)           | 2(3)            | 18(4)           | 0(3)            |
| O1   | 37(3)           | 35(3)           | 22(3)           | 0(2)            | 17(2)           | 5(2)            |
| C2   | 36(4)           | 34(4)           | 56(6)           | -11(4)          | 24(4)           | 0(3)            |
| C3   | 28(4)           | 29(4)           | 46(6)           | -3(4)           | 15(4)           | 4(3)            |
| C11  | 97(5)           | 93(5)           | 97(6)           | 1(2)            | 20(3)           | -1(2)           |
| N2   | 27(3)           | 29(3)           | 41(5)           | 2(3)            | 15(3)           | 0(3)            |
| C7   | 33(4)           | 32(4)           | 39(5)           | 3(4)            | 21(4)           | -2(3)           |

**Table S16.** Bond lengths for crystallographic data of MeOH-absorbed crystal.

| Atom | Atom            | Length ( $\text{\AA}$ ) | Atom | Atom | Length ( $\text{\AA}$ ) |
|------|-----------------|-------------------------|------|------|-------------------------|
| Cu1  | N1              | 1.929(7)                | C5   | C6   | 1.486(9)                |
| Cu1  | O1              | 2.228(5)                | C5   | C4   | 1.394(11)               |
| Cu1  | N2 <sup>1</sup> | 1.908(8)                | C5   | C3   | 1.400(12)               |
| N1   | C1              | 1.358(11)               | C8   | C6   | 1.412(11)               |
| N1   | C2              | 1.335(12)               | C8   | C10  | 1.382(13)               |
| P14  | O2              | 1.567(6)                | C6   | C7   | 1.390(11)               |
| P14  | O4              | 1.575(6)                | C4   | C2   | 1.370(14)               |
| P14  | O3              | 1.502(6)                | C1   | C3   | 1.363(14)               |
| P14  | O1              | 1.528(6)                | O5   | C11  | 1.356(19)               |
| C9   | N2              | 1.352(11)               | C10  | N2   | 1.344(11)               |
| C9   | C7              | 1.411(12)               |      |      |                         |

Symmetry operations: <sup>1</sup>-1+X,-Y,1/2+Z

**Table S17.** Torsion angles for crystallographic data of MeOH-absorbed crystal.

| A   | B   | C   | D                | Angle (°) | A   | B   | C  | D                | Angle (°) |
|-----|-----|-----|------------------|-----------|-----|-----|----|------------------|-----------|
| Cu1 | N1  | C1  | C3               | -173.4(8) | C1  | N1  | C2 | C4               | 0.2(16)   |
| Cu1 | N1  | C2  | C4               | 174.2(9)  | O2  | P14 | O1 | Cu1              | 137.6(4)  |
| N1  | C1  | C3  | C5               | -0.2(16)  | O4  | P14 | O1 | Cu1              | -108.9(4) |
| C5  | C6  | C7  | C9               | 177.5(8)  | O3  | P14 | O1 | Cu1              | 13.6(5)   |
| C5  | C4  | C2  | N1               | -0.8(17)  | C10 | C8  | C6 | C5               | -177.8(8) |
| C8  | C6  | C7  | C9               | -3.6(12)  | C10 | C8  | C6 | C7               | 3.3(13)   |
| C8  | C10 | N2  | Cu1 <sup>1</sup> | 177.1(7)  | C2  | N1  | C1 | C3               | 0.4(15)   |
| C8  | C10 | N2  | C9               | -2.8(14)  | C3  | C5  | C6 | C8               | 175.7(10) |
| C6  | C5  | C4  | C2               | -179.3(9) | C3  | C5  | C6 | C7               | -5.4(13)  |
| C6  | C5  | C3  | C1               | 179.8(8)  | C3  | C5  | C4 | C2               | 0.9(15)   |
| C6  | C8  | C10 | N2               | -0.1(15)  | N2  | C9  | C7 | C6               | 0.7(14)   |
| C4  | C5  | C6  | C8               | -4.0(13)  | C7  | C9  | N2 | Cu1 <sup>1</sup> | -177.4(7) |
| C4  | C5  | C6  | C7               | 174.8(10) | C7  | C9  | N2 | C10              | 2.5(14)   |
| C4  | C5  | C3  | C1               | -0.4(14)  |     |     |    |                  |           |

<sup>1</sup>1+X,-Y,-1/2+Z**Table S18.** Hydrogen Atom Coordinates (Å×10<sup>4</sup>) and Isotropic Displacement Parameters (Å<sup>2</sup>×10<sup>3</sup>) for crystallographic data of MeOH-absorbed crystal.

| Atom | x        | y        | z       | U(eq) |
|------|----------|----------|---------|-------|
| H9   | 11015.93 | -3015.2  | 4489.55 | 38    |
| H8   | 9543.52  | 1897.56  | 5096.65 | 38    |
| H4   | 7696.84  | 2343.48  | 6047.07 | 49    |
| H1   | 4620.6   | -1514.59 | 7109.38 | 40    |
| H2   | 2258.15  | 6001.46  | 8987.86 | 67    |
| H5   | 9629.26  | 4543.72  | 5732.25 | 95    |
| H4A  | 3991.58  | 5855.06  | 5627.15 | 56    |
| H10  | 11647.47 | 1339.9   | 4065.54 | 40    |
| H2A  | 5554.37  | 2806.78  | 7028.23 | 48    |
| H3   | 6754.13  | -2103    | 6169.27 | 40    |
| H11A | 8063.92  | 3650.77  | 3528.04 | 144   |
| H11B | 8581.29  | 5364.41  | 3428.89 | 144   |
| H11C | 6946.2   | 4983.26  | 3799.56 | 144   |
| H7   | 8871     | -2568.09 | 5568.08 | 39    |

## E. References

1. Sheldrick, G. M. SHELXL-97, A program for crystal structure refinement Göttingen, **1997**.
2. Sheldrick, G. M. Crystal structure refinement with SHELXL. *Acta. Cryst.* **2015**, C71, 3-8.
3. Sheldrick, G. M. SHELXT- Integrated space-group and crystal-structure determination. *Acta. Cryst.* **2015**, A71, 3-8.
4. Dolomanov, O. V., Bourhis, L. J., Gildea, R. J., Howard, J. A. K., Puschmann, H. OLEX2: a complete structure solution, refinement and analysis program. *J. Appl. Cryst.* **2009**, 42, 339-341.
